# Supplementary material for: Meta-Analysis of Randomized Controlled Trials on Yoga, Psychosocial, and Mindfulness-Based Interventions for Cancer-Related Fatigue: What Intervention Characteristics Are Related to Higher Efficacy?
Source: MDPI journal article supplement (doi:10.3390/cancers14082016), 2022-04-15
Supplement: s1 [file s1]

**Table S1.1.** Search strategy for psychosocial interventions in PsycInfo and CINAHL.

| ID | Search                                                                                                                                                                                                                                                                                                                                                                                                                         |
|----|--------------------------------------------------------------------------------------------------------------------------------------------------------------------------------------------------------------------------------------------------------------------------------------------------------------------------------------------------------------------------------------------------------------------------------|
| #1 | TI (psychosocial OR psychotherapy OR psychological OR cognitive OR behavior* OR CBT OR psychoeducat* OR imagery OR "energy conservation" OR "stress management" OR "self-management" OR "emotion regulation") OR AB (psychosocial OR psychotherapy OR psychological OR cognitive OR behavior* OR CBT OR psychoeducat* OR imagery OR "energy conservation" OR "stress management" OR "self-management" OR "emotion regulation") |
| #2 | TI (cancer* OR tumor OR tumour OR malignancy OR radiotherapy OR neoplas* OR carcinoma* OR leukemia* OR leukaemia* OR lymphoma* OR "bone marrow transplant*" OR "stem cell transplant*" OR chemotherapy) OR AB (cancer* OR tumor OR tumour OR malignancy OR radiotherapy OR neoplas* OR carcinoma* OR leukemia* OR leukaemia* OR lymphoma* OR "bone marrow transplant*" OR "stem cell transplant*" OR chemotherapy)             |
| #3 | TI fatigue OR AB fatigue                                                                                                                                                                                                                                                                                                                                                                                                       |
| #4 | TI (random* OR RCT OR intervention) OR AB (random* OR RCT OR intervention)                                                                                                                                                                                                                                                                                                                                                     |
| #5 | #1 AND #2 AND #3 AND #4                                                                                                                                                                                                                                                                                                                                                                                                        |

Note: \* = all words beginning with the same letters before the asterisk were included in the search.

**Table S1.2.** Search strategy for psychosocial interventions in Pubmed.

| ID | Search                                                                                                                                                                                                                                                                                                                                                                                                                                 |
|----|----------------------------------------------------------------------------------------------------------------------------------------------------------------------------------------------------------------------------------------------------------------------------------------------------------------------------------------------------------------------------------------------------------------------------------------|
| #1 | psychosocial[Title/Abstract] OR psychotherapy[Title/Abstract] OR psychological[Title/Abstract] OR cognitive[Title/Abstract] OR behavior*[Title/Abstract] OR behaviour*[Title/Abstract] OR CBT[Title/Abstract] OR psychoeducat*[Title/Abstract] OR imagery[Title/Abstract] OR "energy conservation"[Title/Abstract] OR "stress management"[Title/Abstract] OR "self-management"[Title/Abstract] OR "emotion regulation"[Title/Abstract] |
| #2 | cancer*[Title/Abstract] OR tumor[Title/Abstract] OR tumour[Title/Abstract] OR malignancy[Title/Abstract] OR radiotherapy[Title/Abstract] OR neoplas*[Title/Abstract] OR carcinoma*[Title/Abstract] OR leukemia*[Title/Abstract] OR leukaemia*[Title/Abstract] OR lymphoma*[Title/Abstract] OR "bone marrow transplant*" [Title/Abstract] OR "stem cell transplant*" [Title/Abstract] OR chemotherapy[Title/Abstract]                   |
| #3 | fatigue[Title/Abstract]                                                                                                                                                                                                                                                                                                                                                                                                                |
| #4 | random*[Title/Abstract] OR RCT[Title/Abstract] OR intervention[Title/Abstract]                                                                                                                                                                                                                                                                                                                                                         |
| #5 | #1 AND #2 AND #3 AND #4                                                                                                                                                                                                                                                                                                                                                                                                                |

Note: \* = all words beginning with the same letters before the asterisk were included in the search.

**Table S1.3.** Search strategy for mindfulness-based interventions in PsycInfo and CINAHL.

| ID | Search                                                                                                                                                                                                                                                                                                                                                                                                             |
|----|--------------------------------------------------------------------------------------------------------------------------------------------------------------------------------------------------------------------------------------------------------------------------------------------------------------------------------------------------------------------------------------------------------------------|
| #1 | TI (mindful OR mindfulness OR MBSR OR MBCT OR body-mind OR mind-body) OR AB (mindful OR mindfulness OR MBSR OR MBCT OR body-mind OR mind-body)                                                                                                                                                                                                                                                                     |
| #2 | TI (cancer* OR tumor OR tumour OR malignancy OR radiotherapy OR neoplas* OR carcinoma* OR leukemia* OR leukaemia* OR lymphoma* OR "bone marrow transplant*" OR "stem cell transplant*" OR chemotherapy) OR AB (cancer* OR tumor OR tumour OR malignancy OR radiotherapy OR neoplas* OR carcinoma* OR leukemia* OR leukaemia* OR lymphoma* OR "bone marrow transplant*" OR "stem cell transplant*" OR chemotherapy) |
| #3 | TI fatigue OR AB fatigue                                                                                                                                                                                                                                                                                                                                                                                           |
| #4 | TI (random* OR RCT OR intervention) OR AB (random* OR RCT OR intervention)                                                                                                                                                                                                                                                                                                                                         |
| #5 | #1 AND #2 AND #3 AND #4                                                                                                                                                                                                                                                                                                                                                                                            |

Note: \* = all words beginning with the same letters before the asterisk were included in the search.

**Table S1.4.** Search strategy for mindfulness-based interventions in Pubmed.

| ID | Search                                                                                                                                                                                                                                                                                                                                                                                                               |
|----|----------------------------------------------------------------------------------------------------------------------------------------------------------------------------------------------------------------------------------------------------------------------------------------------------------------------------------------------------------------------------------------------------------------------|
| #1 | mindful[Title/Abstract] OR mindfulness[Title/Abstract] OR MBSR[Title/Abstract] OR MBCT[Title/Abstract] OR body-mind[Title/Abstract] OR mind-body[Title/Abstract]                                                                                                                                                                                                                                                     |
| #2 | cancer*[Title/Abstract] OR tumor[Title/Abstract] OR tumour[Title/Abstract] OR malignancy[Title/Abstract] OR radiotherapy[Title/Abstract] OR neoplas*[Title/Abstract] OR carcinoma*[Title/Abstract] OR leukemia*[Title/Abstract] OR leukaemia*[Title/Abstract] OR lymphoma*[Title/Abstract] OR "bone marrow transplant*" [Title/Abstract] OR "stem cell transplant*" [Title/Abstract] OR chemotherapy[Title/Abstract] |
| #3 | fatigue[Title/Abstract]                                                                                                                                                                                                                                                                                                                                                                                              |
| #4 | random*[Title/Abstract] OR RCT[Title/Abstract] OR intervention[Title/Abstract]                                                                                                                                                                                                                                                                                                                                       |

|    |                         |
|----|-------------------------|
| #5 | #1 AND #2 AND #3 AND #4 |
|----|-------------------------|

*Note:* \* = all words beginning with the same letters before the asterisk were included in the search.

**Table S1.5.** Search strategy for yoga interventions in PsycInfo and CINAHL.

| ID | Search                                                                                                                                                                                                                                                                                                                                                                                                                |
|----|-----------------------------------------------------------------------------------------------------------------------------------------------------------------------------------------------------------------------------------------------------------------------------------------------------------------------------------------------------------------------------------------------------------------------|
| #1 | TI (yoga OR yogic OR asana OR pranayama OR Dhyana OR dharana)<br>OR AB (yoga OR yogic OR asana OR pranayama OR Dhyana OR dharana)                                                                                                                                                                                                                                                                                     |
| #2 | TI (cancer* OR tumor OR tumour OR malignancy OR radiotherapy OR neoplas* OR carcinoma* OR leukemia* OR leukaemia* OR lymphoma* OR "bone marrow transplant*" OR "stem cell transplant*" OR chemotherapy)<br>OR AB (cancer* OR tumor OR tumour OR malignancy OR radiotherapy OR neoplas* OR carcinoma* OR leukemia* OR leukaemia* OR lymphoma* OR "bone marrow transplant*" OR "stem cell transplant*" OR chemotherapy) |
| #3 | TI fatigue OR AB fatigue                                                                                                                                                                                                                                                                                                                                                                                              |
| #4 | TI (random* OR RCT OR intervention) OR AB (random* OR RCT OR intervention)                                                                                                                                                                                                                                                                                                                                            |
| #5 | #1 AND #2 AND #3 AND #4                                                                                                                                                                                                                                                                                                                                                                                               |

*Note:* \* = all words beginning with the same letters before the asterisk were included in the search.

**Table S1.6.** Search strategy for yoga interventions in Pubmed.

| ID | Search                                                                                                                                                                                                                                                                                                                                                                                                               |
|----|----------------------------------------------------------------------------------------------------------------------------------------------------------------------------------------------------------------------------------------------------------------------------------------------------------------------------------------------------------------------------------------------------------------------|
| #1 | yoga[Title/Abstract] OR yogic[Title/Abstract] OR asana[Title/Abstract] OR pranayama[Title/Abstract] OR Dhyana[Title/Abstract] OR dharana[Title/Abstract]                                                                                                                                                                                                                                                             |
| #2 | cancer*[Title/Abstract] OR tumor[Title/Abstract] OR tumour[Title/Abstract] OR malignancy[Title/Abstract] OR radiotherapy[Title/Abstract] OR neoplas*[Title/Abstract] OR carcinoma*[Title/Abstract] OR leukemia*[Title/Abstract] OR leukaemia*[Title/Abstract] OR lymphoma*[Title/Abstract] OR "bone marrow transplant*" [Title/Abstract] OR "stem cell transplant*" [Title/Abstract] OR chemotherapy[Title/Abstract] |
| #3 | fatigue[Title/Abstract]                                                                                                                                                                                                                                                                                                                                                                                              |
| #4 | random*[Title/Abstract] OR RCT[Title/Abstract] OR intervention[Title/Abstract]                                                                                                                                                                                                                                                                                                                                       |
| #5 | #1 AND #2 AND #3 AND #4                                                                                                                                                                                                                                                                                                                                                                                              |

*Note:* \* = all words beginning with the same letters before the asterisk were included in the search.
