# Supplementary material for: Meta-Analysis of Randomized Controlled Trials on Yoga, Psychosocial, and Mindfulness-Based Interventions for Cancer-Related Fatigue: What Intervention Characteristics Are Related to Higher Efficacy?
Source: MDPI journal article supplement (doi:10.3390/cancers14082016), 2022-04-15
Supplement: s1 [file s1]

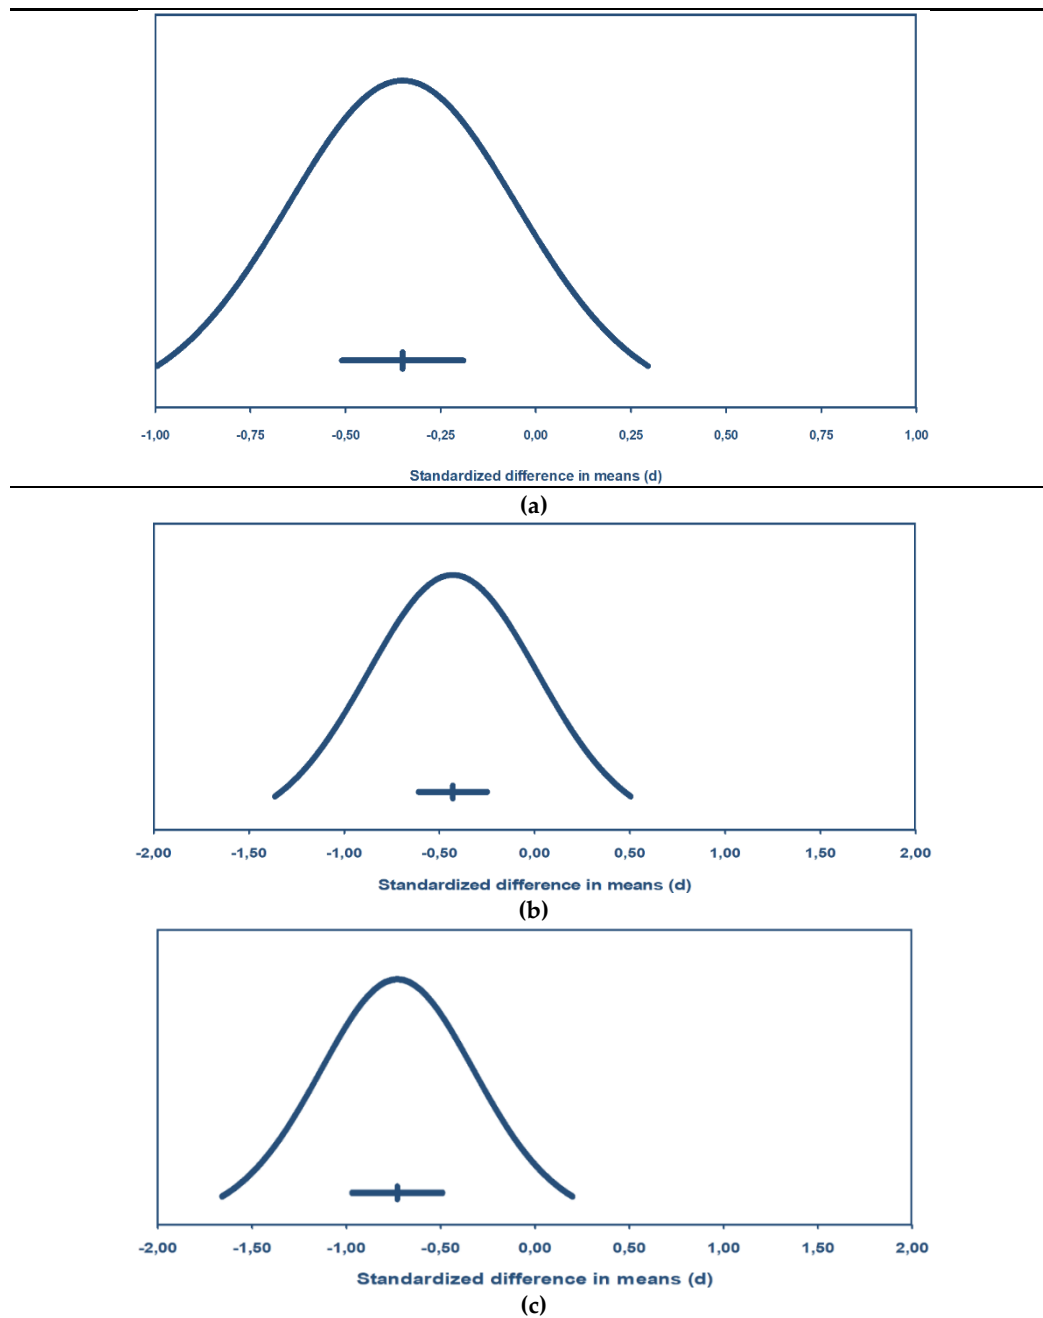

**Figure S3.** Prediction intervals for true effects with a 95% confidence interval of (a) yoga interventions, (b) psychosocial interventions, and (c) mindfulness-based interventions. *Note:* The straight line represents the mean effect size with a 95% confidence interval.
