# Supplementary material for: Meta-Analysis of Randomized Controlled Trials on Yoga, Psychosocial, and Mindfulness-Based Interventions for Cancer-Related Fatigue: What Intervention Characteristics Are Related to Higher Efficacy?
Source: MDPI journal article supplement (doi:10.3390/cancers14082016), 2022-04-15
Supplement: s1 [file s1]

## Section S.1.1. Yoga Interventions

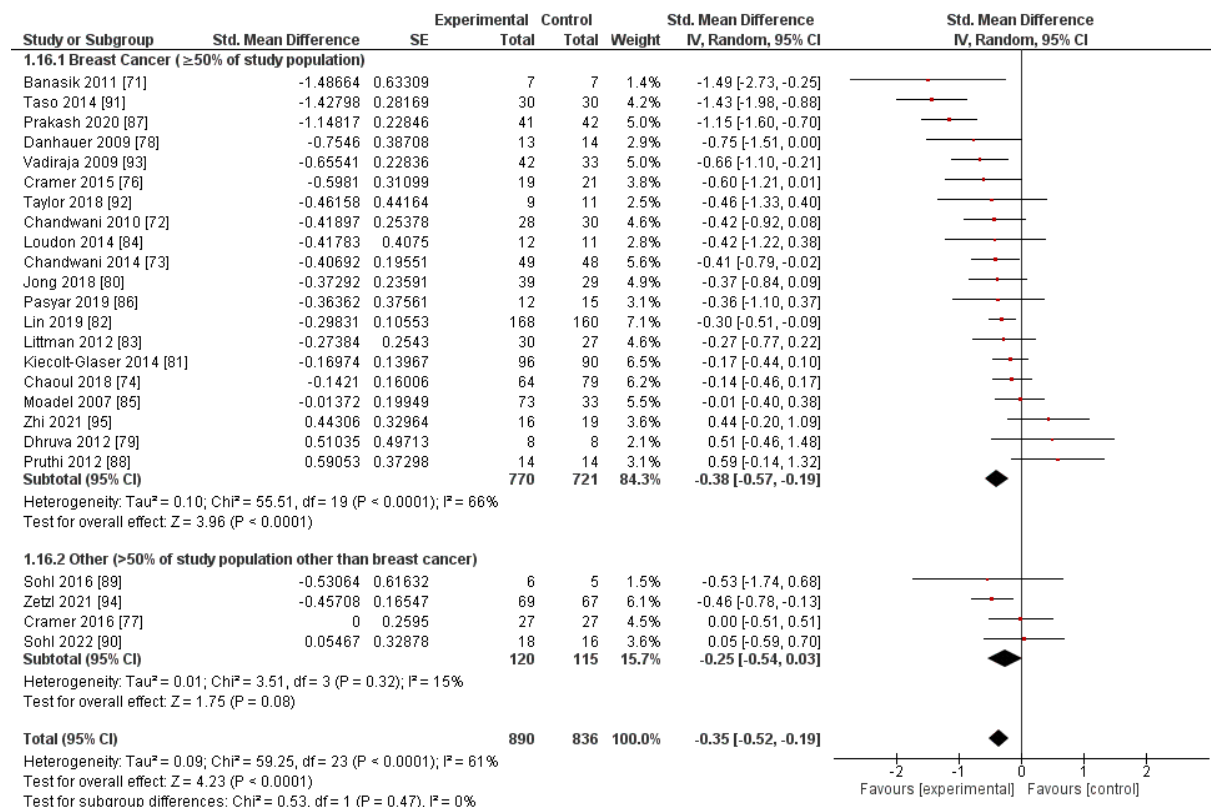

**Figure S1.1.1.** Comparison of yoga interventions regarding entity of study population (at least 50% of study population having breast cancer vs. other).

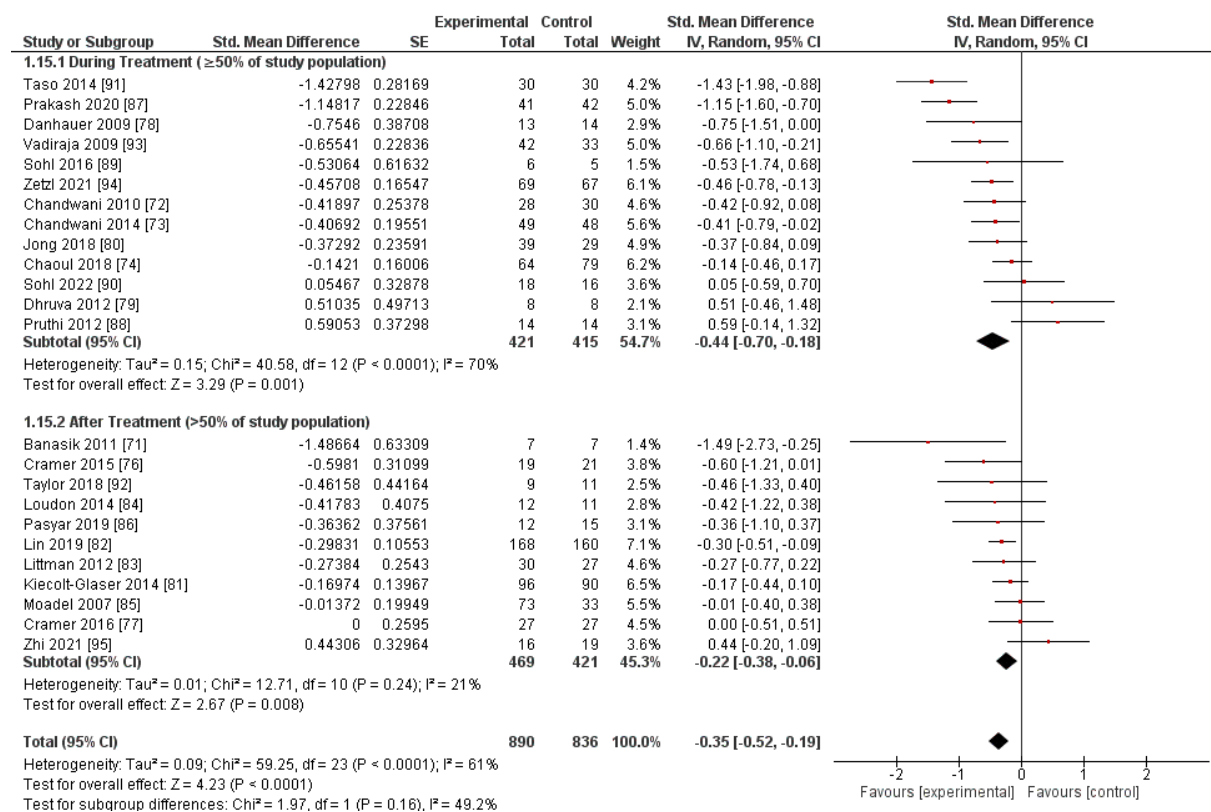

**Figure S1.1.2.** Comparison of yoga interventions regarding treatment status of study population (at least 50% of study population during treatment vs. other).

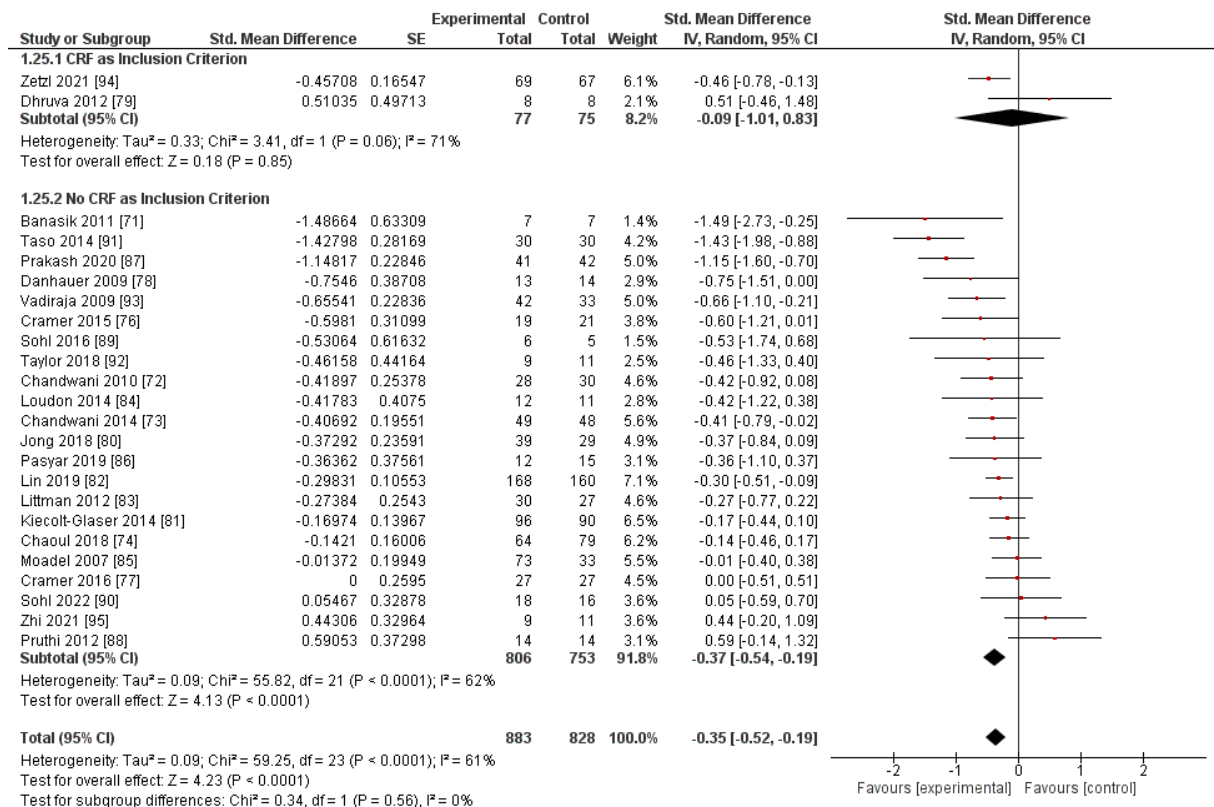

**Figure S1.1.3.** Comparison of yoga interventions regarding whether a specific level of cancer-related fatigue was required as an inclusion criterion. *Note:* CRF = cancer-related fatigue.

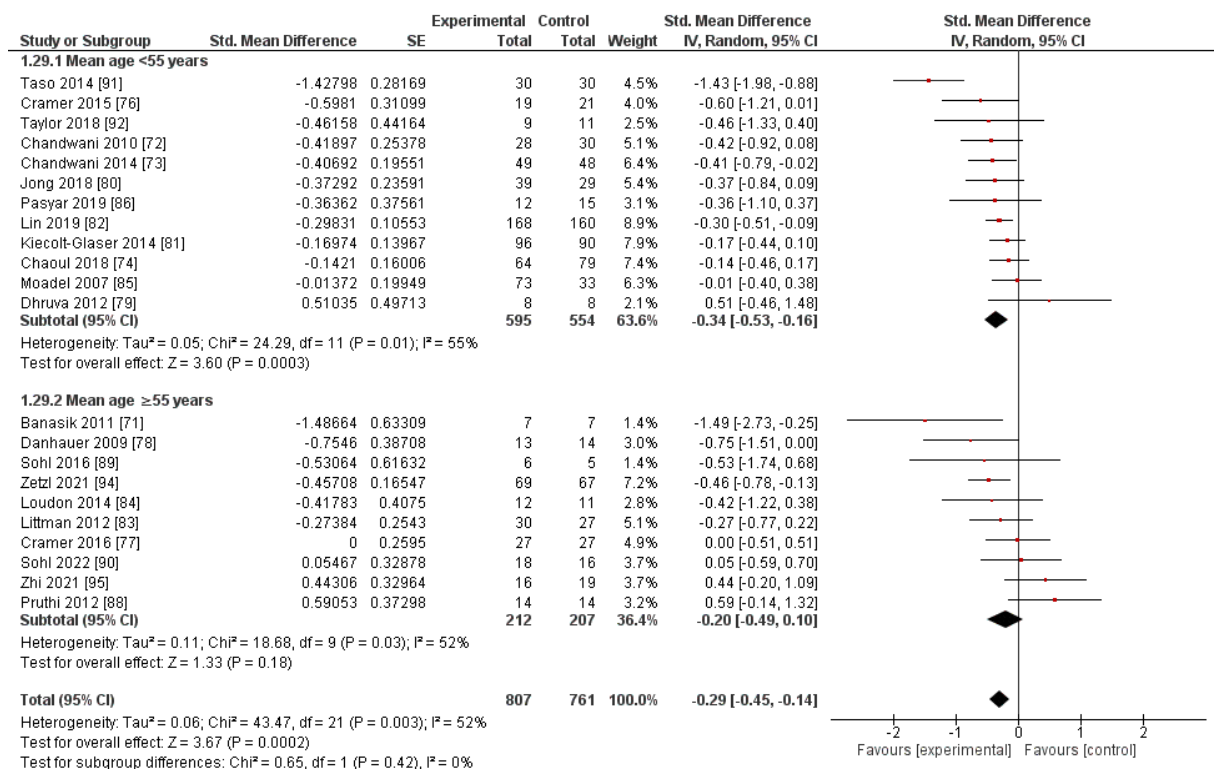

**Figure S1.1.4.** Comparison of yoga interventions regarding age of study population (cut-off was oriented towards median ( = 54.3 years)). *Note:* Two studies ((Prakash (2020) [87] and Vadiraia (2009) [93]) did not report a mean age.

## Section S1.2. Psychosocial Interventions

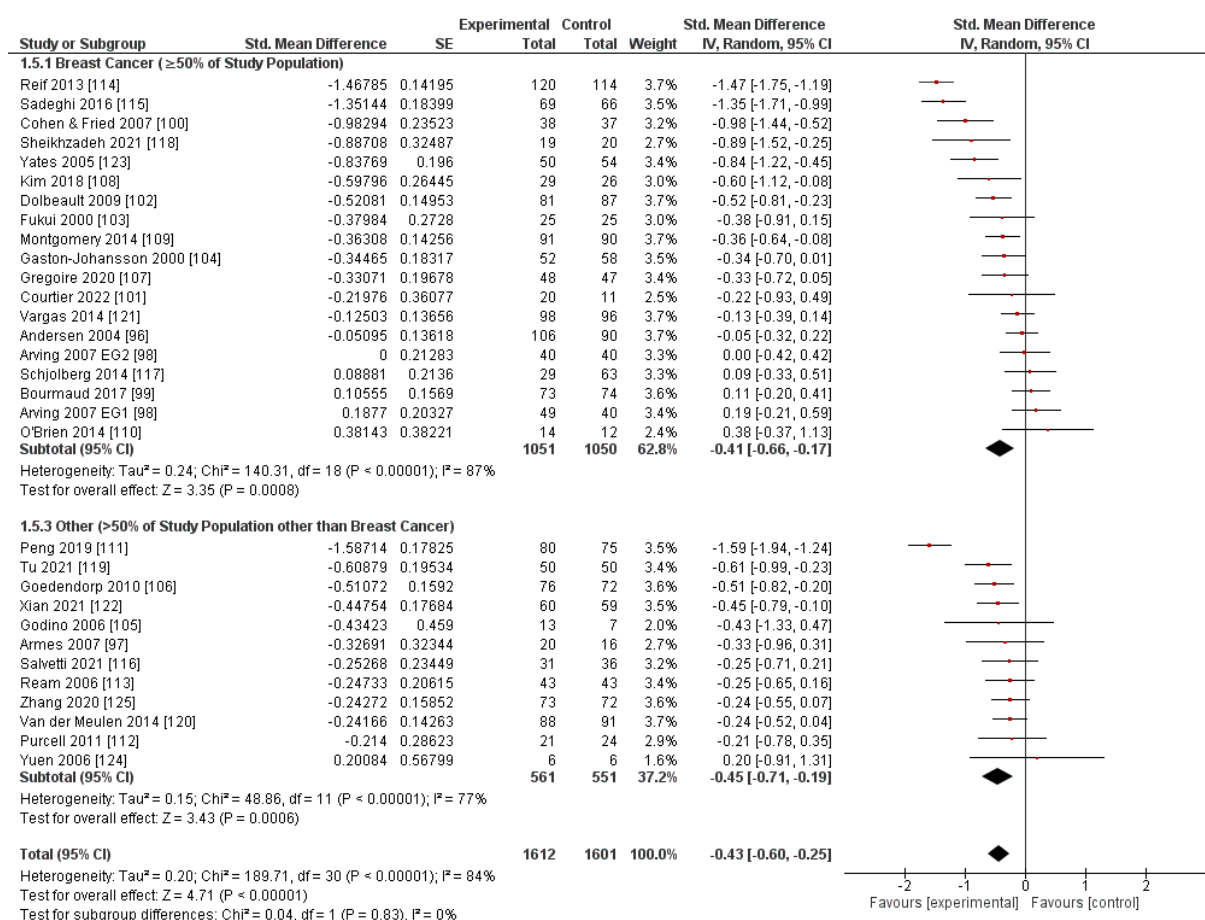

**Figure S1.2.1.** Comparison of psychosocial interventions regarding entity of study population (at least 50% of study population having breast cancer vs. other).

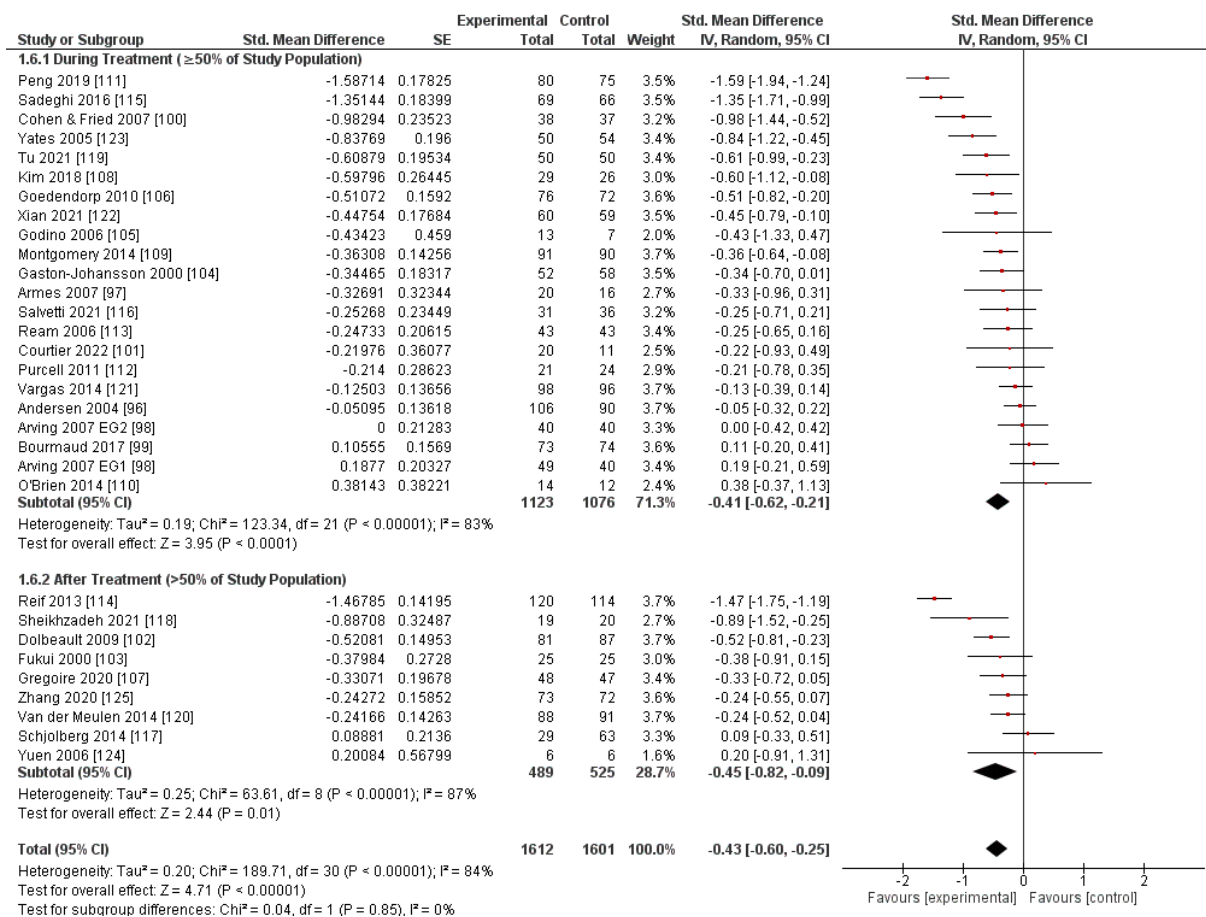

**Figure S1.2.2.** Comparison of psychosocial interventions regarding treatment status of study population (at least 50% of study population during treatment vs. other).

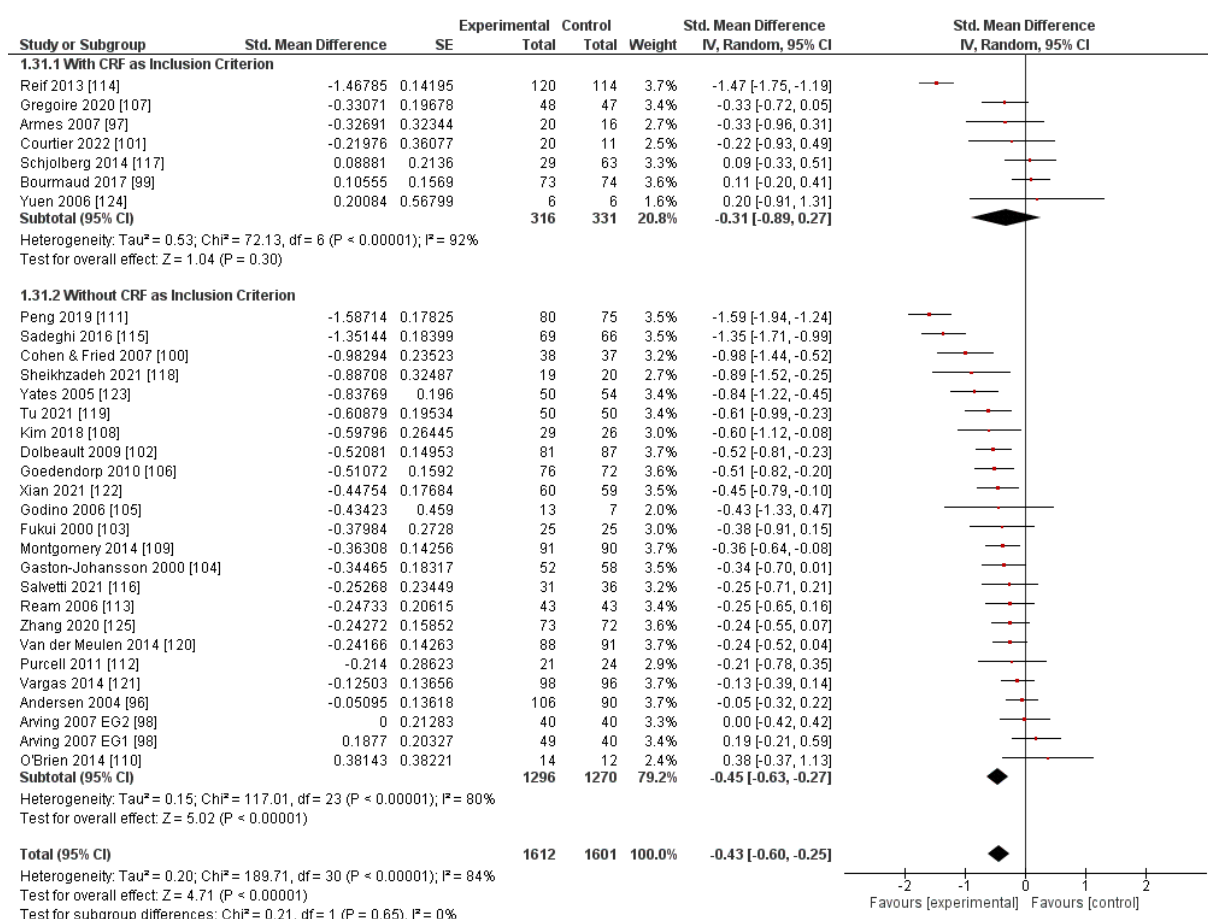

**Figure S1.2.3.** Comparison of psychosocial interventions regarding whether a specific level of CRF was required as an inclusion criterion. *Note:* CRF = cancer-related fatigue.

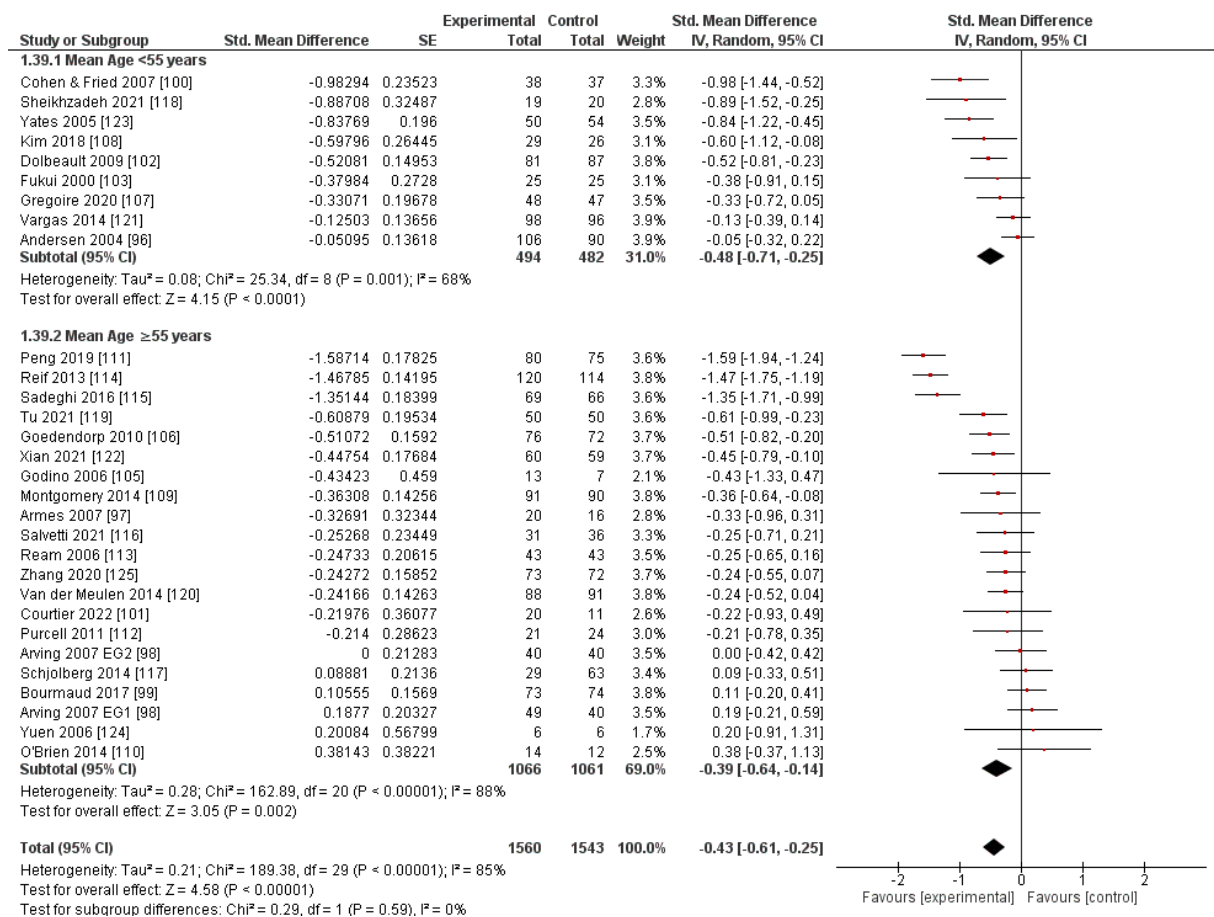

**Figure S1.2.4.** Comparison of psychosocial interventions regarding age of study population (cut-off was oriented towards median (=55.8 years)). *Note:* One study (Gaston-Johansson (2000) [104]) did not report a mean age.

## Section S1.3.Mindfulness-based Interventions

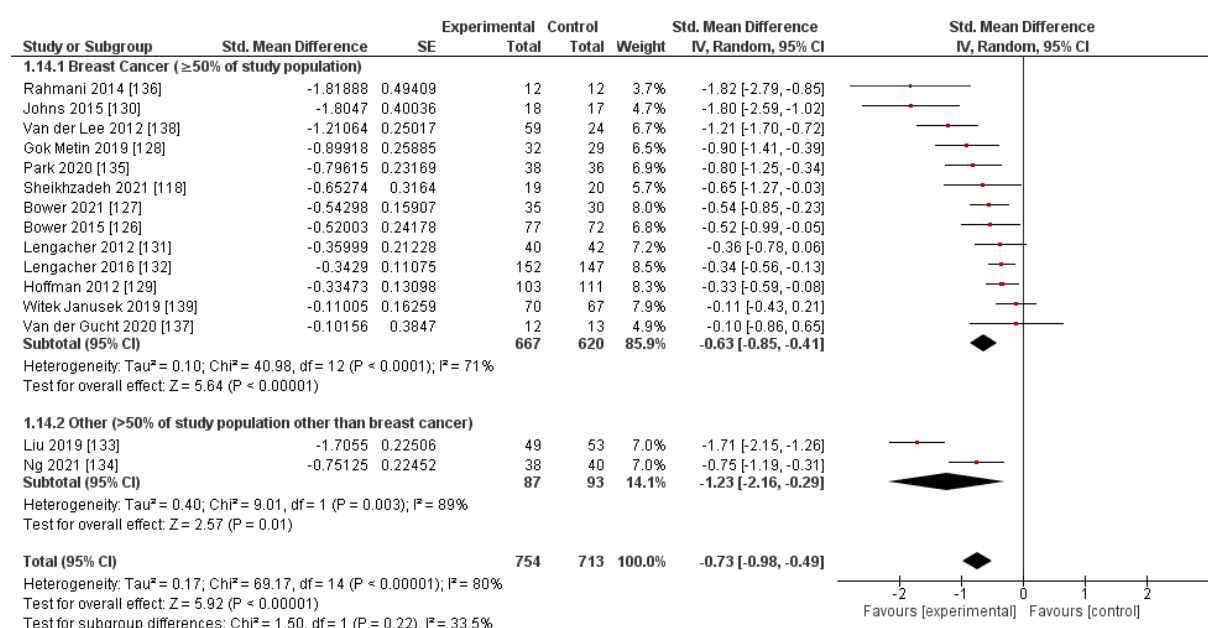

**Figure S1.3.1.** Comparison of mindfulness-based interventions regarding entity of study population (at least 50% of study population having breast cancer vs. other).

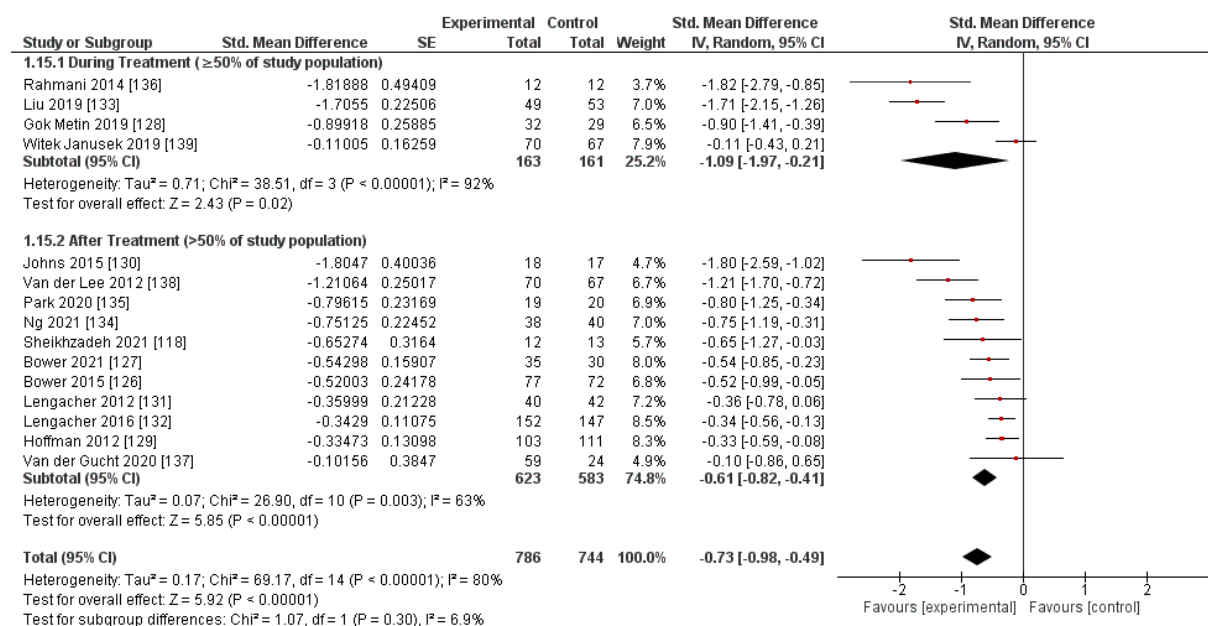

**Figure S1.3.2.** Comparison of mindfulness-based interventions regarding treatment status of study population (at least 50% of study population during treatment vs. other). *Note:* Studies that did not report treatment status (Ng (2021) [134]; Park (2020) [135]; Sheikhzadeh (2021) [118]) were assigned to after treatment.

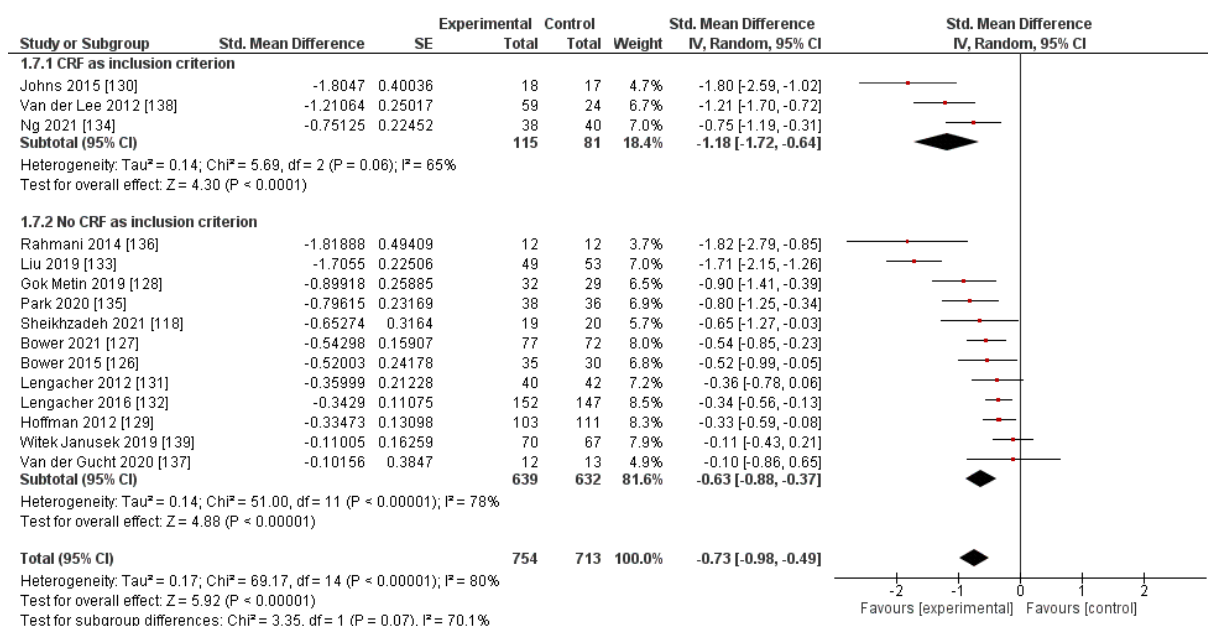

**Figure S1.3.3.** Comparison of mindfulness-based interventions regarding whether a specific level of CRF was required as an inclusion criterion. *Note:* CRF = cancer-related fatigue.

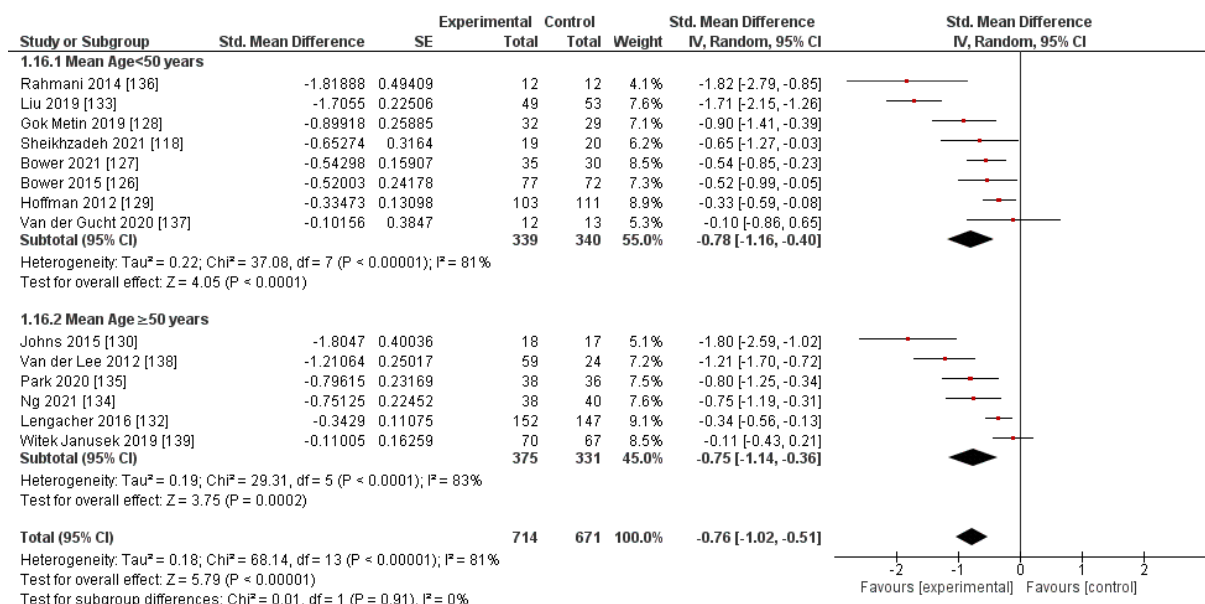

**Figure S1.3.4.** Comparison of mindfulness-based interventions regarding age of study population (cut-off was oriented towards median (=48.7 years)). *Note:* One study (Lengacher (2012) [131]) did not report a mean age.

## References

87. Prakash, K.; Saini, S.K.; Pugazhendhi, S. Effectiveness of Yoga on Quality of Life of Breast Cancer Patients Undergoing Chemotherapy: A Randomized Clinical Controlled Study. *Indian J. Palliat. Care* **2020**, *26*, 323–331. [https://doi.org/10.4103/ijpc.ijpc\\_192\\_19](https://doi.org/10.4103/ijpc.ijpc_192_19).
93. Vadiraja, S.H.; Rao, M.R.; Nagendra, R.H.; Nagarathna, R.; Rekha, M.; Vanitha, N.; Gopinath, S.K.; Srinath, B.; Vishweshwara, M.; Madhavi, Y.; et al. Effects of yoga on symptom management in breast cancer patients: A randomized controlled trial. *Int. J. Yoga Ther.* **2009**, *2*, 73–79. <https://doi.org/10.4103/0973-6131.60048>.
104. Gaston-Johansson, F.; Fall-Dickson, J.M.; Nanda, J.; Ohly, K.V.; Stillman, S.; Krumm, S.; Kennedy, M.J. The effectiveness of the comprehensive coping strategy program on clinical outcomes in breast cancer autologous bone marrow transplantation. *Cancer Nurs.* **2000**, *23*, 277–285. <https://doi.org/10.1097/00002820-200008000-00004>.



118. Sheikhzadeh, M.; Zanjani, Z.; Baari, A. Efficacy of Mindfulness-Based Cognitive Therapy and Cognitive Behavioral Therapy for Anxiety, Depression, and Fatigue in Cancer Patients: A Randomized Clinical Trial. *Iran. J. Psychiatry* **2021**, *16*, 271–280. <https://doi.org/10.18502/ijps.v16i3.6252>.
131. Lengacher, C.A.; Reich, R.R.; Post-White, J.; Moscoso, M.; Shelton, M.M.; Barta, M.; Le, N.; Budhrani, P. Mindfulness based stress reduction in post-treatment breast cancer patients: An examination of symptoms and symptom clusters. *J. Behav. Med.* **2012**, *35*, 86–94. <https://doi.org/10.1007/s10865-011-9346-4>.
134. Ng, D.L.; Gan, G.G.; Anuar, N.A.; Tung, Y.Z.; Lai, N.Z.; Tan, Y.W.; Said, S.N.M.; Madihie, A.; Chai, C.S.; Tan, S.B. The effect of a single session of 30-min mindful breathing in reducing fatigue among patients with haematological cancer—A randomised controlled trial. *BMC Palliat. Care* **2021**, *20*, 160. <https://doi.org/10.1186/s12904-021-00855-7>.
135. Park, S.; Sato, Y.; Takita, Y.; Tamura, N.; Ninomiya, A.; Kosugi, T.; Sado, M.; Nakagawa, A.; Takahashi, M.; Hayashida, T.; et al. Mindfulness-Based Cognitive Therapy for Psychological Distress, Fear of Cancer Recurrence, Fatigue, Spiritual Well-Being, and Quality of Life in Patients with Breast Cancer-A Randomized Controlled Trial. *J. Pain Symptom Manag.* **2020**, *60*, 381–389. <https://doi.org/10.1016/j.jpainsymman.2020.02.017>.
