# Supplementary material for: Meta-Analysis of Randomized Controlled Trials on Yoga, Psychosocial, and Mindfulness-Based Interventions for Cancer-Related Fatigue: What Intervention Characteristics Are Related to Higher Efficacy?
Source: MDPI journal article supplement (doi:10.3390/cancers14082016), 2022-04-15
Supplement: s1 [file s1]

**Table S2.1.** Characteristics of included yoga interventions.

| Study<br>(Author +<br>Year +<br>Country)  | Description of<br>study population                                                                                                                         | Instrument(s)<br>used to measure<br>fatigue <sup>a</sup> | Description of intervention <sup>b</sup>                                                                                                                                                                                                                                                                                                               | Description of<br>control |
|-------------------------------------------|------------------------------------------------------------------------------------------------------------------------------------------------------------|----------------------------------------------------------|--------------------------------------------------------------------------------------------------------------------------------------------------------------------------------------------------------------------------------------------------------------------------------------------------------------------------------------------------------|---------------------------|
| Banasik [71]<br>(2011)<br>United States   | $n = 14$<br>$M_{Age} = 62.9$<br>Breast Cancer<br>Stage: II-IV<br>After treatment<br>(not reported which)                                                   | <b>FACT-B</b>                                            | Content: Iyengar yoga, moderate physical effort,<br>variety between sessions<br>Setting: group-based <sup>c</sup><br>Duration: 8 weeks<br>Session number: 16 ( $M = 14$ )<br>Session length: 1.5h<br>Additional home practice: no                                                                                                                      | Wait-List<br>Control      |
| Chandwani [72]<br>(2010)<br>United States | $n = 58$<br>$M_{Age} = 45.7$<br>Breast Cancer<br>Stage: 0-III<br>During treatment<br>(radiotherapy, some after<br>surgery and/or<br>chemotherapy)          | <b>BFI</b>                                               | Content: based on Patanjali's yoga tradition,<br>breathing techniques, meditation, moderate physical<br>effort, no variety between sessions<br>Setting: individually (majority)<br>Duration: 6 weeks<br>Session number: 12 ( $M = 10.23^c$ )<br>Session length: 1h<br>Additional home practice: yes (daily; practice log)                              | Wait-List<br>Control      |
| Chandwani [73]<br>(2014)<br>United States | $n = 97$<br>$M_{Age} = 51.8$<br>Breast Cancer<br>Stage: 0-III<br>During treatment (adjuvant<br>radiotherapy, some after<br>surgery and/or<br>chemotherapy) | <b>BFI</b>                                               | Content: based on Patanjali's yoga tradition,<br>breathing techniques, meditation, moderate physical<br>effort, no variety between sessions<br>Setting: individually (majority)<br>Duration: 6 weeks<br>Session number: up to 18 ( $M = 13.8$ )<br>Session length: 1h<br>Additional home practice: yes (no specific time<br>recommended; practice log) | Wait-List<br>Control      |
| Chaoul [74]<br>(2018)<br>United States    | $n = 143$<br>$M_{Age} = 49.2$<br>Breast Cancer<br>Stage: I-III                                                                                             | <b>BFI</b>                                               | Content: Tibetan yoga, breathing techniques,<br>meditation, imagery, mild physical effort, no variety<br>between sessions<br>Setting: individually (majority)                                                                                                                                                                                          | Wait-List<br>Control      |

|                                          |                                                                                                                                                                              |                |                                                                                                                                                                                                                                                                                    |                      |
|------------------------------------------|------------------------------------------------------------------------------------------------------------------------------------------------------------------------------|----------------|------------------------------------------------------------------------------------------------------------------------------------------------------------------------------------------------------------------------------------------------------------------------------------|----------------------|
|                                          | During treatment<br>(neo-/adjuvant<br>chemotherapy)                                                                                                                          |                | Duration: length of chemotherapy (majority<br>completed within 12 weeks)<br>Session number: 4 ( $M = 3.28^c$ ) + 3 booster sessions<br>during follow-up ( $M = 0.81^c$ )<br>Session length: 1.25-1.5h<br>Additional home practice: yes (daily; no practice log)                    |                      |
| Cohen [75]<br>(2004)<br>United States    | $n = 30$<br>$M_{Age} = 51$<br>Hodgkin/non-Hodgkin<br>Lymphoma<br>Stage: I-IV<br>During or after treatment<br>(chemotherapy)                                                  | <b>BFI</b>     | Content: Tibetan yoga, meditation, imagery, mild<br>physical effort<br>(not reported: variety between sessions)<br>Setting: individually<br>Duration: 7 weeks<br>Session number: 7 ( $M = 4.6^c$ )<br>Session length: 1h<br>Additional home practice: yes (daily; no practice log) | Wait-List<br>Control |
| Cramer [76]<br>(2015)<br>Germany         | $n = 40^d$<br>$M_{Age} = 49.2$<br>Breast Cancer<br>Stage: I-III<br>After treatment (surgery,<br>and/or radiotherapy,<br>and/or chemotherapy)                                 | <b>FACIT-F</b> | Content: Hatha yoga, breathing techniques,<br>meditation, moderate physical effort, variety<br>between sessions<br>Setting: group-based<br>Duration: 12 weeks<br>Session number: 12 ( $M = 9.7$ )<br>Session length: 1.5h<br>Additional home practice: yes (daily; practice log)   | Wait-List<br>Control |
| Cramer [77]<br>(2016)<br>Germany         | $n = 54^d$<br>$M_{Age} = 68.3$<br>Colorectal Cancer<br>Stage: I-III<br>After/during treatment<br>(after surgery, some<br>during/after chemotherapy<br>or after radiotherapy) | <b>FACIT-F</b> | Content: Hatha yoga, breathing techniques,<br>meditation, moderate physical effort, variety<br>between sessions<br>Setting: group-based<br>Duration: 10 weeks<br>Session number: 10 ( $M = 5.3$ )<br>Session length: 1.5h<br>Additional home practice: yes (daily; practice log)   | Wait-List<br>Control |
| Danhauer [78]<br>(2009)<br>United States | $n = 27$<br>$M_{Age} = 55.8$<br>Breast Cancer<br>Stage: DCIS, I-IV<br>After/during treatment<br>(after surgery, some during                                                  | <b>FACT-F</b>  | Content: Restorative yoga, breathing awareness (no<br>techniques specified), meditation, mild physical<br>effort, no variety between sessions<br>Setting: group-based<br>Duration: 10 weeks<br>Session number: 10 ( $M = 5.8$ )                                                    | Wait-List<br>Control |

|                                                             |                                                                                                                                                           |                                                                                                                                                                  |                                                                                                                                                                                                                                                                                                                   |                                                                                      |
|-------------------------------------------------------------|-----------------------------------------------------------------------------------------------------------------------------------------------------------|------------------------------------------------------------------------------------------------------------------------------------------------------------------|-------------------------------------------------------------------------------------------------------------------------------------------------------------------------------------------------------------------------------------------------------------------------------------------------------------------|--------------------------------------------------------------------------------------|
|                                                             | chemotherapy and/or radiotherapy)                                                                                                                         |                                                                                                                                                                  | Session length: 1.25h<br>Additional home practice: no                                                                                                                                                                                                                                                             |                                                                                      |
| Dhruva [79]<br>(2012)<br>United States                      | $n = 16^e$<br>$M_{Age} = 54.2$<br>Mixed Entities<br>(50% Breast Cancer)<br>Stage: not reported<br>During treatment (adjuvant or neoadjuvant chemotherapy) | <b>R-PFS</b>                                                                                                                                                     | Content: Pranayama breathing, breathing techniques, no physical effort, no variety between sessions<br>Setting: individually/group-based<br>Duration: two consecutive cycles of chemotherapy<br>Session number: 3 <sup>c</sup><br>Session length: 1h<br>Additional home practice: yes (twice a day; practice log) | Wait-List Control<br>(received same intervention as EG in 2nd cycle of chemotherapy) |
| Jong [80]<br>(2018)<br>Netherlands                          | $n = 68$<br>$M_{Age} = 51$<br>Breast Cancer<br>Stage: I-III<br>During treatment (during neo-/adjuvant chemotherapy, some before/after radiotherapy)       | <b>MFI (general,</b><br>physical fatigue,<br>mental fatigue,<br>reduced activity,<br>reduced motivation)<br>FQL (frustrating, exhausting, pleasant, frightening) | Content: Dru yoga, breathing techniques, imagery, moderate physical effort, no variety between sessions<br>Setting: group-based<br>Duration: 12 weeks<br>Session number: 12 ( $M = 8^c$ )<br>Session length: 1.25h<br>Additional home practice: yes (daily; practice log)                                         | Wait-List Control                                                                    |
| Kiecolt-Glaser <sup>d</sup><br>[81] (2014)<br>United States | $n = 186$<br>$M_{Age} = 51.6$<br>Breast Cancer<br>Stage: 0-IIIa<br>After treatment (surgery, some additional chemotherapy and/or radiotherapy)            | <b>MFSI-SF</b>                                                                                                                                                   | Content: Hatha yoga, breathing techniques, moderate physical effort, variety between sessions<br>Setting: group-based<br>Duration: 12 weeks<br>Session number: 24 ( $M = 18.1$ )<br>Session length: 1.5h<br>Additional home practice: yes (no specific time recommended; practice log)                            | Wait-List Control                                                                    |
| Lin [82]<br>(2019)<br>United States                         | $n = 328$<br>$M_{Age} = 54.3$<br>Mixed Entities<br>(77% Breast Cancer)<br>Stage: 0-IV                                                                     | <b>MFSI (total,</b><br>general, physical, emotional, mental, vigor)                                                                                              | Content: Hatha and Restorative yoga, breathing techniques, meditation, imagery, moderate physical effort, no variety between sessions<br>Setting: group-based<br>Duration: 4 weeks                                                                                                                                | Standard Care                                                                        |

|                                      |                                                                                                                                                                            |                                                       |                                                                                                                                                                                                                                                                                                                                                                      |                   |
|--------------------------------------|----------------------------------------------------------------------------------------------------------------------------------------------------------------------------|-------------------------------------------------------|----------------------------------------------------------------------------------------------------------------------------------------------------------------------------------------------------------------------------------------------------------------------------------------------------------------------------------------------------------------------|-------------------|
|                                      | After treatment (surgery and/or chemotherapy and/or radiotherapy and/or hormone therapy)                                                                                   |                                                       | Session number: 8-12 ( $M = 6.5$ )<br>Session length: 1.25h<br>Additional home practice: yes (once per week; no practice log)                                                                                                                                                                                                                                        |                   |
| Littman [83] (2012)<br>United States | $n = 57$<br>$M_{Age} = 59.4$<br>Breast Cancer<br>Stage: 0-III<br>After treatment (not reported which)                                                                      | <b>FACIT</b>                                          | Content: Hatha yoga (Viniyoga), breathing techniques, meditation, moderate physical effort, no variety between sessions<br>Setting: group-based<br>Duration: 6 months<br>Session number: $M = 19.6$ (2-3 facility-based classes a week encouraged)<br>Session length: 1.25h<br>Additional home practice: yes (remainder until reaching 5 weekly practices; reminder) | Wait-List Control |
| Loudon [84] (2014)<br>Australia      | $n = 23$<br>$M_{Age} = 57.8$<br>Breast Cancer<br>Stage: DCIS, I-III<br>After treatment (surgery, partly plus chemotherapy and/or radiotherapy)                             | <b>VAS (Fatigue severity, fatigue limit activity)</b> | Content: based on Satyananda yoga tradition, breathing techniques, meditation, imagery, moderate physical effort, no variety between sessions<br>Setting: group-based<br>Duration: 8 weeks<br>Session number: 8 ( $M = 7.76^{\circ}$ )<br>Session length: 1.5h<br>Additional home practice: yes (daily, practice log)                                                | Wait-List Control |
| Moadel [85] (2007)<br>United States  | $n = 106^{\dagger}$<br>$M_{Age} = 54.8$<br>Breast Cancer<br>Stage: I-IV<br>After/during treatment (surgery and/or chemotherapy and/or radiotherapy and/or hormone therapy) | <b>FACIT-F</b>                                        | Content: Hatha yoga, breathing techniques, meditation, mild physical effort (not reported: variety between sessions)<br>Setting: group-based<br>Duration: 12 weeks<br>Session number: 12 ( $M = 7$ )<br>Session length: 1.5h<br>Additional home practice: yes (daily, no practice log)                                                                               | Wait-List Control |
| Pasyar [86] (2019)<br>Iran           | $n = 27$<br>$M_{Age} = 51.7$<br>Breast Cancer                                                                                                                              | <b>EORTC QOL-C30</b>                                  | Content: no specific yoga style, breathing techniques, mild physical effort, variety between sessions                                                                                                                                                                                                                                                                | Standard Care     |

|                                        |                                                                                                                                                                                                                                                  |                           |                                                                                                                                                                                                                                                                                                                                                              |                                                                              |
|----------------------------------------|--------------------------------------------------------------------------------------------------------------------------------------------------------------------------------------------------------------------------------------------------|---------------------------|--------------------------------------------------------------------------------------------------------------------------------------------------------------------------------------------------------------------------------------------------------------------------------------------------------------------------------------------------------------|------------------------------------------------------------------------------|
|                                        | Stage: not reported<br>After treatment (surgery,<br>partly plus chemotherapy<br>and/or radiotherapy)                                                                                                                                             |                           | Setting: individually <sup>c</sup><br>Duration: 8 weeks<br>Session number: 16<br>Session length: 0.75h<br>Additional home practice: yes (one session per week;<br>practice log)                                                                                                                                                                              |                                                                              |
| Prakash [87]<br>(2020)<br>India        | <i>n</i> = 83<br><i>M</i> <sub>Age</sub> : not reported<br>Breast Cancer<br>Stage: not reported<br>During adjuvant<br>chemotherapy                                                                                                               | <b>EORTC QOL-<br/>C30</b> | Content: no specific yoga style (neck and shoulder<br>exercises), breathing techniques, mild physical<br>effort, no variety between sessions<br>Setting: individually <sup>c</sup><br>Duration: 18 weeks<br>Session number: 6<br>Session length: <i>M</i> = 1.16h<br>Additional home practice: yes (twice daily; no<br>practice log)                         | Standard Care                                                                |
| Pruthi [88]<br>(2012)<br>United States | <i>n</i> = 28<br><i>M</i> <sub>Age</sub> = 56.5<br>Breast Cancer<br>Stage: not reported (non-<br>metastatic)<br>During/after treatment<br>(after surgery, some during<br>adjuvant chemotherapy<br>and/or radiotherapy and/or<br>hormone therapy) | <b>BFI</b>                | Content: gentle Hatha yoga, breathing awareness<br>(no techniques specified), mild physical effort, no<br>variety between sessions<br>Setting: individually and group-based<br>Duration: 12 weeks<br>Session number: 11 ( <i>M</i> = 5.33 <sup>c</sup> )<br>Session length: 1h<br>Additional home practice: yes (at least once per<br>week; no practice log) | Wait-List<br>Control                                                         |
| Sohl [89]<br>(2016)<br>United States   | <i>n</i> = 11<br><i>M</i> <sub>Age</sub> = 61<br>Colorectal Cancer<br>Stage: 0-IV<br>During treatment<br>(chemotherapy)                                                                                                                          | <b>FACT-F</b>             | Content: yoga skills training (seated), breathing<br>techniques, meditation, mild physical effort, no<br>variety between sessions<br>Setting: individually<br>Duration: 8 weeks<br>Session number: 3 ( <i>M</i> = 2.91 <sup>c</sup> )<br>Session length: 0.25h<br>Additional home practice: yes (4 times per week; no<br>practice log)                       | Attention<br>Control<br>(empathic<br>attention and<br>recorded<br>education) |

|                                        |                                                                                                                                                               |                      |                                                                                                                                                                                                                                                                                                                                                |                                           |
|----------------------------------------|---------------------------------------------------------------------------------------------------------------------------------------------------------------|----------------------|------------------------------------------------------------------------------------------------------------------------------------------------------------------------------------------------------------------------------------------------------------------------------------------------------------------------------------------------|-------------------------------------------|
| Sohl [90]<br>(2022)<br>United States   | $n = 34$<br>$M_{Age} = 58.5$<br>Gastrointestinal Cancer<br>Stage: II-IV<br>During treatment<br>(chemotherapy)                                                 | <b>PROMIS-Cancer</b> | Content: yoga skills training (seated), breathing techniques, meditation, mild physical effort, no variety between sessions<br>Setting: individually<br>Duration: 8 weeks<br>Session number: 4 ( $M = 3.1$ )<br>Session length: 0.5h<br>Additional home practice: yes (daily; practice log)                                                    | Attention Control<br>(empathic attention) |
| Taso [91]<br>(2014)<br>Taiwan          | $n = 60$<br>$M_{Age} = 49.3$<br>Breast Cancer<br>Stage: I-III<br>During treatment<br>(chemotherapy)                                                           | <b>BFI</b>           | Content: Yoga based on Anusara, breathing awareness (no techniques specified), meditation, moderate physical effort, no variety between sessions<br>Setting: group-based <sup>c</sup><br>Duration: 8 weeks<br>Session number: 16 ( $M = 15.09^c$ )<br>Session length: 1h<br>Additional home practice: yes (no time specified; no practice log) | Standard Care                             |
| Taylor [92]<br>(2018)<br>United States | $n = 20$<br>$M_{Age} = 53.8$<br>Breast Cancer<br>Stage: I-III<br>After treatment (different adjuvant treatments)                                              | <b>BFI</b>           | Content: restorative yoga, breathing awareness (no techniques specified), meditation, mild physical effort, no variety between sessions<br>Setting: group-based<br>Duration: 8 weeks<br>Session number: 8 ( $M = 4.88^c$ )<br>Session length: 1.25h<br>Additional home practice: no                                                            | Wait-List Control                         |
| Vadiraja [93]<br>(2009)<br>India       | $n = 75$<br>$M_{Age} =$ not reported (Range: 30-70)<br>Breast Cancer<br>Stage: I-III<br>During treatment<br>(radiotherapy, after surgery and/or chemotherapy) | <b>EORTC QLQ-C30</b> | Content: no specific yoga style, breathing techniques, meditation, imagery, mild physical effort, no variety between sessions<br>Setting: individually<br>Duration: 6 weeks<br>Session number: at least 18 ( $M = 21.31^c$ )<br>Session length: 1h<br>Additional home practice: yes (daily; no practice log)                                   | Standard Care                             |

|                                     |                                                                                                                                                                                                                                                          |                           |                                                                                                                                                                                                                                                                                                              |                      |
|-------------------------------------|----------------------------------------------------------------------------------------------------------------------------------------------------------------------------------------------------------------------------------------------------------|---------------------------|--------------------------------------------------------------------------------------------------------------------------------------------------------------------------------------------------------------------------------------------------------------------------------------------------------------|----------------------|
| Zetzl [94]<br>(2021)<br>Germany     | $n = 136^{d,e}$<br>$M_{Age} = 60.4$<br>Mixed Entities (49.1%<br>Breast Cancer)<br>Stage: not reported<br>(curative & palliative)<br>After/during treatment<br>(chemotherapy and/or<br>radiotherapy<br>and/or hormone therapy<br>and/or antibody therapy) | <b>EORTC QLQ-<br/>C30</b> | Content: no specific yoga style, breathing awareness<br>(no techniques specified), meditation, moderate<br>physical effort, no variety between sessions<br>Setting: group-based <sup>c</sup><br>Duration: 8 weeks<br>Session number: 8 ( $M = 6.1^c$ )<br>Session length: 1h<br>Additional home practice: no | Wait-List<br>Control |
|                                     |                                                                                                                                                                                                                                                          |                           |                                                                                                                                                                                                                                                                                                              |                      |
| Zhi [95]<br>(2021)<br>United States | $n = 35$<br>$M_{Age} = 61.7$<br>Breast (92.7%), Ovarian, or<br>Uterine Cancer<br>Stage: I-III<br>After treatment<br>(chemotherapy)                                                                                                                       | <b>BFI</b>                | Content: no specific yoga style, breathing<br>techniques, moderate physical effort, no variety<br>between sessions<br>Setting: group-based<br>Duration: 8 weeks<br>Session number: 16<br>Session length: 1h<br>Additional home practice: yes (5 times per week; no<br>practice log)                          | Wait-List<br>Control |

Notes: EG = experimental group; M<sub>Age</sub>: Mean age of all participants at baseline;  $n$  refers to the total number of participants analyzed for fatigue assessment at post intervention; instruments marked in bold were used for analyzing total fatigue scores.

<sup>a</sup> Instruments:

BFI: Brief Fatigue Inventory.

EORTC QLQ-C30: European Organization for Research and Treatment of Cancer Core Quality of Life Questionnaire - Fatigue Scale

FACIT: Functional Assessment of Chronic Illness Therapy

FACIT-F: Functional Assessment of Chronic Illness Therapy - Fatigue

FACT-B: Functional Assessment of Cancer Therapy - Breast Cancer

FACT-F: Functional Assessment of Cancer Therapy - Fatigue

FSI: Fatigue Symptom Inventory

FQL: Fatigue Quality List

MFI: Multidimensional Fatigue Inventory

MFSI: Multidimensional Fatigue Scale Inventory

MFSI-SF: Multidimensional Fatigue Syndrome Inventory - Short Form.

PROMIS-Cancer: Patient-Reported Outcomes Measurement Information System - Cancer

R-PFS: Revised Piper Fatigue Scale

VAS: Visual Analogue Scale

<sup>b</sup> Content:

breathing techniques: use of at least one technique aimed at conscious breathing.

imagery: any exercise aimed at creating visual representations.

meditation: any mindfulness practice aimed at concentration on the present moment.

physical effort: no physical effort = no movement exercise; mild = only sitting or lying positions; moderate = yoga exercises were performed in different positions (or assessment based on intervention description).

variety between sessions: yoga exercises changed from session to session.

session number: indicated is the planned session number and, if indicated, average participation in sessions by participants in parentheses.

practice at home: indicated in parentheses is the frequency of practice and the type of recommendation (voluntarily, asked, encouraged, expected).

c The information was not explicitly given in the manuscript but could be inferred.

d Missing post-intervention values were imputed.

e Participants had to report some degree of fatigue as inclusion criteria.

f  $n=22$  outliers were omitted.



**Table S2.2.** Characteristics of included psychosocial interventions.

| Study<br>(Author +<br>Year +<br>Country) | Description of<br>study population                                                                                                                                       | Instrument(s)<br>used to measure<br>fatigue <sup>a</sup> | Description of intervention <sup>b</sup>                                                                                                                                                                                                                                                                             | Description of<br>control |
|------------------------------------------|--------------------------------------------------------------------------------------------------------------------------------------------------------------------------|----------------------------------------------------------|----------------------------------------------------------------------------------------------------------------------------------------------------------------------------------------------------------------------------------------------------------------------------------------------------------------------|---------------------------|
| Andersen [96]<br>(2004)<br>United States | <i>n</i> = 196<br><i>M</i> <sub>Age</sub> = 50.8<br>Breast Cancer<br>Stage: II-III<br>During treatment<br>(adjuvant<br>chemotherapy)                                     | <b>POMS-F</b>                                            | Content: work on cognitions, work on behavior,<br>social resources, relaxation<br>Setting: group-based, face to face and via<br>telephone (in absence)<br>Duration: 4 months<br>Session number: 18 ( <i>M</i> = 17) (+ 8 follow up<br>sessions)<br>Session length: 1.5h                                              | Standard care             |
| Armes [97]<br>(2007)<br>United Kingdom   | <i>n</i> = 36 <sup>c</sup><br><i>M</i> <sub>Age</sub> = 59.1<br>Mixed Entities<br>(33% Colon Cancer<br>patients)<br>Stage: I-IV<br>During treatment<br>(chemotherapy)    | <b>VAS (global<br/>fatigue)</b>                          | Content <sup>d</sup> : CRF education, work on cognitions,<br>work on behavior<br>Setting: individually, face to face<br>Duration: 9-12 weeks<br>Session number: 3 ( <i>M</i> = 2.6 <sup>e</sup> )<br>Session length: 1h                                                                                              | Standard care             |
| Arving [98]<br>(2007)<br>EG 1<br>Sweden  | <i>n</i> = 89<br><i>M</i> <sub>Age</sub> = 55<br>Breast Cancer<br>Stage: 0-IV<br>During treatment<br>(adjuvant chemotherapy,<br>radiotherapy, and/or<br>hormone therapy) | <b>EORTC QLQ-<br/>C30</b>                                | Content: work on cognitions, work on behavior,<br>social resources, relaxation, homework (practice<br>strategies) (all conducted by psychologists)<br>Setting: individually, face to face and via<br>telephone<br>Duration: <i>M</i> = 210 days<br>Session number: 0-23 ( <i>M</i> = 4.5)<br>Session length: 0.75-1h | Standard Care             |
| Arving [98]<br>(2007)<br>EG 2<br>Sweden  | <i>n</i> = 80<br><i>M</i> <sub>Age</sub> = 55<br>Breast Cancer<br>Stage: 0-IV<br>During treatment<br>(adjuvant chemotherapy,                                             | <b>EORTC QLQ-<br/>C30</b>                                | Content: work on cognitions, work on behavior,<br>social resources, relaxation, homework (practice<br>strategies) (all conducted by nurses)<br>Setting: individually, face to face and via<br>telephone<br>Duration: <i>M</i> = 172 days<br>Session number: 0-16 ( <i>M</i> = 3.8)                                   | Standard Care             |

|                     |                                       |                       |                                                           |               |
|---------------------|---------------------------------------|-----------------------|-----------------------------------------------------------|---------------|
|                     | radiotherapy, and/or hormone therapy) |                       | Session length: 0.75-1h                                   |               |
|                     |                                       | <b>FACT-F</b>         |                                                           |               |
|                     |                                       | PFS                   |                                                           |               |
|                     | $n = 147^c$                           | (behavioural/sev      | Content <sup>d</sup> : CRF education, work on behavior    |               |
|                     | $M_{Age} = 55.9$                      | erity, affective      | Setting: group-based, face to face                        |               |
| Bourmaud [99]       | Mixed Entities                        | meaning,              | Duration: 6 weeks                                         | Wait-List     |
| (2017)              | (58.5% Breast Cancer)                 | sensory,              | Session number: 5 ( $M = 3.77$ )                          | Control       |
| France              | Stage: all                            | cognitive/mood)       | Session length: 2h                                        |               |
|                     | During treatment                      | EORTC QLQ-            |                                                           |               |
|                     | (chemotherapy and/or                  | C30                   |                                                           |               |
|                     | radiotherapy)                         | VAS (fatigue          |                                                           |               |
|                     |                                       | severity)             |                                                           |               |
|                     |                                       |                       |                                                           |               |
|                     | $n = 75$                              |                       | Content: work on cognitions, work on behavior,            |               |
|                     | $M_{Age} = 54.4$                      |                       | homework (practice strategies)                            |               |
| Cohen & Fried [100] | Breast Cancer                         | <b>FSI (severity,</b> | Setting: group-based, face to face                        | Standard Care |
| (2007)              | Stage: I-II                           | interference,         | Duration: 9 weeks                                         |               |
| Israel              | During treatment                      | frequency)            | Session number: 9                                         |               |
|                     | (adjuvant chemotherapy                |                       | Session length: 1.5h                                      |               |
|                     | and/or radiotherapy)                  |                       |                                                           |               |
|                     | $n = 31^c$                            |                       | Content <sup>d</sup> : CRF education, work on cognitions, |               |
|                     | $M_{Age} = 58.3$                      |                       | work on behavior, work on emotions, social                |               |
|                     | Breast Cancer                         |                       | resources, homework (activity and sleep diary)            |               |
| Courtier [101]      | Stage: 0–IIIA                         | <b>FACIT-F</b>        | Setting: individually, face to face                       | Standard Care |
| (2022)              | During treatment                      |                       | Duration: 3 weeks                                         |               |
| United Kingdom      | (radiotherapy, partly                 |                       | Session number: 3                                         |               |
|                     | after chemotherapy)                   |                       | Session length: 1h                                        |               |
|                     |                                       |                       |                                                           |               |
|                     | $n = 168$                             |                       | Content: work on cognitions, work on behavior,            |               |
|                     | $M_{Age} = 53.1$                      |                       | social resources, relaxation                              |               |
| Dolbeault [102]     | Breast Cancer                         | <b>POMS-F</b>         | Setting: group-based, face to face                        | Wait-List     |
| (2009)              | Stage: “Early stage”                  | EORTC QLQ-            | Duration: 8 weeks                                         | Control       |
| France              | After treatment                       | C30                   | Session number: 8                                         |               |
|                     | (radiotherapy alone or                |                       | Session length: 2h                                        |               |
|                     | combined with                         |                       |                                                           |               |
|                     | chemotherapy)                         |                       |                                                           |               |

|                                                   |                                                                                                                                                                                                                                  |                                                               |                                                                                                                                                                                                                                                   |                      |
|---------------------------------------------------|----------------------------------------------------------------------------------------------------------------------------------------------------------------------------------------------------------------------------------|---------------------------------------------------------------|---------------------------------------------------------------------------------------------------------------------------------------------------------------------------------------------------------------------------------------------------|----------------------|
| Fukui [103]<br>(2000)<br>Japan                    | $n = 50$<br>$M_{Age} = 53.5$<br>Breast Cancer<br>Stage: I-III<br>After treatment<br>(surgery, some after<br>chemotherapy)                                                                                                        | <b>POMS-F</b>                                                 | Content: work on cognitions, work on behavior,<br>social resources, relaxation, homework (practice<br>relaxation)<br>Setting: group-based, face to face<br>Duration: 6 weeks<br>Session number: 6<br>Session length: 1.5h                         | Wait-List<br>Control |
| Gaston-Johansson<br>[104] (2000)<br>United States | $n = 110$<br>$M_{Age}$ = not reported<br>Breast Cancer<br>Stage: II-IV<br>During treatment<br>(neoadjuvant<br>chemotherapy; after<br>autologous bone marrow<br>or peripheral blood stem<br>cell transplantation)                 | <b>VAS (degree of<br/>fatigue)</b>                            | Content: work on cognitions, relaxation,<br>homework (practice relaxation)<br>Setting: individually <sup>e</sup> , face to face<br>Duration: 9 days<br>Session number: 4<br>Session length: 1h (initial session) – 0.25h (Follow-<br>up sessions) | Standard Care        |
| Godino [105]<br>(2006)<br>Spain                   | $n = 20$<br>$M_{Age} = 60.3$<br>Colon or Gastric Cancer<br>Stage: not reported<br>During treatment<br>(chemotherapy)                                                                                                             | <b>FACT-F</b>                                                 | Content: CRF education, work on behavior,<br>homework (diary)<br>Setting: individually, face to face<br>Duration: 6 months <sup>e</sup><br>Session number: 3<br>Session length: not reported (0.5h assumed)                                       | Standard Care        |
| Goedendorp [106]<br>(2010)<br>Netherlands         | $n = 148^f$<br>$M_{Age} = 56.4$<br>Mixed Entities<br>(47.3% Breast Cancer<br>patients)<br>Stage: not reported<br>(curative treatment)<br>During treatment<br>(surgery, chemotherapy,<br>radiotherapy, and/or<br>hormone therapy) | <b>CIS-fat</b>                                                | Content <sup>d</sup> : CRF education, work on cognitions,<br>work on behavior, social resources<br>Setting: individually, face to face and via<br>telephone<br>Duration: 6 months<br>Session number: up to 10 ( $M = 6.2$ )<br>Session length: 1h | Standard Care        |
| Grégoire [107]<br>(2020)<br>Belgium               | $n = 95^{c, f}$<br>$M_{Age} = 53.9$<br>Mixed Entities                                                                                                                                                                            | <b>MFI (general<br/>fatigue, physical<br/>fatigue, mental</b> | Content: work on cognitions, work on behavior,<br>relaxation, hypnosis, homework (self-care tasks<br>and diary)                                                                                                                                   | Wait-List<br>Control |

|                                             |                                                                                                                                                                  |                                                                                      |                                                                                                                                                                                                                                                                                                                  |                                                   |
|---------------------------------------------|------------------------------------------------------------------------------------------------------------------------------------------------------------------|--------------------------------------------------------------------------------------|------------------------------------------------------------------------------------------------------------------------------------------------------------------------------------------------------------------------------------------------------------------------------------------------------------------|---------------------------------------------------|
|                                             | (78.9% Breast Cancer patients)<br>Stage: not reported (non-metastatic)<br>After treatment (surgery, chemotherapy, radiotherapy, and/or hormone therapy)          | fatigue, reduced motivation, reduced activity)                                       | Setting: group-based, face to face<br>Duration: 8 weeks<br>Session number: 8 ( $M = 6.5$ )<br>Session length: 2h                                                                                                                                                                                                 |                                                   |
| Kim [108]<br>(2018)<br>South Korea          | $n = 55$<br>$M_{Age} = 48$<br>Breast Cancer<br>Stage: I-III<br>During treatment (adjuvant chemotherapy)                                                          | <b>EORTC QLQ-C30</b>                                                                 | Content: work on cognitions, work on behavior, work on emotions, social resources<br>Setting: individually, face-to-face and via telephone<br>Duration: 7 weeks<br>Session number: 7<br>Session length: 0.5-1h                                                                                                   | Standard Care                                     |
| Montgomery [109]<br>(2014)<br>United States | $n = 181$<br>$M_{Age} = 55.8$<br>Breast Cancer<br>Stage: 0-III<br>During treatment (radiotherapy, some with chemotherapy before and/or adjuvant hormone therapy) | <b>FACIT-F</b><br>VAS (fatigue, muscle weakness)                                     | Content <sup>d</sup> : work on cognitions, work on behavior, relaxation, hypnosis, homework (workbook)<br>Setting: individually, face to face<br>Duration: length of radiotherapy<br>Session number: individual ( $M = 12.29$ )<br>Session length: 15 min (regular sessions); 30 min (initial and final session) | Attention Control<br>(conversation-based support) |
| O'Brien [110]<br>(2014)<br>Australia        | $n = 26$<br>$M_{Age} = 61.3$<br>Mixed Entities (60% Breast Cancer patients)<br>Stage: not reported<br>During treatment (chemotherapy or radiotherapy)            | <b>MFI (general, physical, mental fatigue, reduced activity, reduced motivation)</b> | Content <sup>d</sup> : CRF education, work on behavior<br>Setting: individually, face to face and via telephone<br>Duration: 4 weeks<br>Session number: 3 (2 via telephone)<br>Session length: 1h (face to face session; telephone sessions not specified)                                                       | Standard Care                                     |
| Peng [111]<br>(2019)<br>China               | $n = 155$<br>$M_{Age} = 60.4$<br>Lung Cancer                                                                                                                     | <b>EORTC QLQ-C30</b>                                                                 | Content: work on cognitions, work on behavior, social resources<br>Setting: group-based, face to face                                                                                                                                                                                                            | Standard Care                                     |

|                                        |                                                                                                                                                                     |                                                                                                                                                                                                |                                                                                                                                                                                                                                                                                             |                      |
|----------------------------------------|---------------------------------------------------------------------------------------------------------------------------------------------------------------------|------------------------------------------------------------------------------------------------------------------------------------------------------------------------------------------------|---------------------------------------------------------------------------------------------------------------------------------------------------------------------------------------------------------------------------------------------------------------------------------------------|----------------------|
|                                        | Stage: III-IV<br>During treatment<br>(radiotherapy)                                                                                                                 |                                                                                                                                                                                                | Duration: 8 weeks<br>Session number: 8<br>Session length: 1.5h                                                                                                                                                                                                                              |                      |
| Purcell [112]<br>(2011)<br>Australia   | $n = 45$<br>$M_{Age} = 58.8$<br>Mixed Entities<br>(35.8% Breast Cancer<br>patients)<br>Stage: not reported<br>Before & after treatment<br>(radiotherapy)            | <b>MFI (general,</b><br>physical, mental<br>fatigue, reduced<br>activity, reduced<br>motivation)                                                                                               | Content <sup>d</sup> : CRF education, work on behavior<br>Setting: group-based, face to face and via<br>telephone<br>Duration: length of radiotherapy + 5-6 weeks<br>Session number: 4 (2 via telephone)<br>Session length: 1h (face to face sessions; telephone<br>sessions not specified) | Standard Care        |
| Ream [113]<br>(2006)<br>United Kingdom | $n = 86$<br>$M_{Age} = 56.5$<br>Mixed Entities<br>(22% esophageal cancer)<br>Stage: not reported<br>(curative and palliative)<br>During treatment<br>(chemotherapy) | <b>VAS (mean<br/>fatigue score,</b><br>extent of fatigue,<br>distress caused<br>by fatigue,<br>disruption to<br>work/chores by<br>fatigue,<br>disruption to<br>pastimes/hobbies<br>by fatigue) | Content <sup>d</sup> : CRF education, work on behavior,<br>homework (diary)<br>Setting: individually, face to face<br>Duration: three chemotherapy cycles (9 weeks<br>assumed)<br>Session number: 3<br>Session length: not reported (1h assumed)                                            | Standard Care        |
| Reif [114]<br>(2013)<br>Germany        | $n = 234^c$<br>$M_{Age} = 57.7$<br>Mixed Entities<br>(58,6% breast cancer)<br>Stage: not reported<br>After treatment<br>(all kind of therapies)                     | <b>FAQ</b><br>EORTC QLQ-<br>C30                                                                                                                                                                | Content <sup>d</sup> : CRF education, work on cognitions,<br>work on behavior, work on emotions, homework<br>(diary, different exercises)<br>Setting: group-based, face to face<br>Duration: 6 weeks<br>Session number: 6<br>Session length: 1.5h                                           | Wait-List<br>Control |
| Sadeghi [115]<br>(2016)<br>Iran        | $n = 135^f$<br>$M_{Age} = 55.7$<br>Breast Cancer<br>Stage: I-IIIa<br>During treatment<br>(chemotherapy)                                                             | <b>CFS (total,</b><br>physical,<br>cognitive,<br>affective)                                                                                                                                    | Content <sup>d</sup> : work on behavior, homework<br>(monitoring, activity list)<br>Setting: group-based, face to face<br>Duration: 5 weeks<br>Session number: 5<br>Session length: 1.5h                                                                                                    | Wait-List<br>Control |

|                                      |                                                                                                                                                                                                                          |                                                                    |                                                                                                                                                                                                                          |                   |
|--------------------------------------|--------------------------------------------------------------------------------------------------------------------------------------------------------------------------------------------------------------------------|--------------------------------------------------------------------|--------------------------------------------------------------------------------------------------------------------------------------------------------------------------------------------------------------------------|-------------------|
| Salveti [116]<br>(2021)<br>Brazil    | $n = 108^e$<br>$M_{Age} = 55.2$<br>Mixed Entities (50% colorectal cancer)<br>Stage: not reported (37,5% with metastasis)<br>During treatment (chemotherapy or radiotherapy)                                              | <b>EORTC-QLQ-C30</b>                                               | Content: CRF education, work on cognitions, work on behavior, relaxation, homework (practice relaxation)<br>Setting: individually, face to face<br>Duration: 6 weeks<br>Session number: 6<br>Session length: $M = 0.75h$ | Standard Care     |
| Schjolberg [117]<br>(2014)<br>Norway | $n = 92^c$<br>$M_{Age} = 55.3$<br>Breast Cancer<br>Stage: I-II<br>After treatment (chemotherapy, radiotherapy; some during their final radiation, and/or during hormone therapy)                                         | <b>FQ (total, physical, mental, chronic) LFS (fatigue, energy)</b> | Content <sup>d</sup> : CRF education, work on behavior, homework (diary)<br>Setting: group-based, face to face<br>Duration: 3 weeks<br>Session number: 3<br>Session length: 2h                                           | Standard Care     |
| Sheikhzadeh [118]<br>(2021)<br>Iran  | $n = 39$<br>$M_{Age} = 47.8$<br>Mixed Entities (67% breast cancer)<br>Stage: not reported (41.4% with metastasis)<br>Treatment status: not reported (chemotherapy, hormone therapy, target therapy, and/or radiotherapy) | <b>CFS</b>                                                         | Content: work on cognitions, work on behavior, relaxation<br>Setting: group-based, face to face<br>Duration: 8 weeks<br>Session number: 8<br>Session length: 1.5h                                                        | Wait-List Control |
| Tu [119]<br>(2021)<br>China          | $n = 100$<br>$M_{Age} = 56.9^e$<br>Lung Cancer<br>Stage: II-IV<br>During treatment (chemotherapy)                                                                                                                        | <b>CFS-Total Fatigue</b>                                           | Content: work on cognitions, work on emotions, social resources<br>Setting: individually, face to face<br>Duration: 4 weeks<br>Session number: 8<br>Session length: 0.5-0.67h                                            | Standard Care     |

|                                            |                                                                                                                                                                      |                                                                                                                       |                                                                                                                                                                                                                                                                                 |                                                             |
|--------------------------------------------|----------------------------------------------------------------------------------------------------------------------------------------------------------------------|-----------------------------------------------------------------------------------------------------------------------|---------------------------------------------------------------------------------------------------------------------------------------------------------------------------------------------------------------------------------------------------------------------------------|-------------------------------------------------------------|
| Van der Meulen [120] (2014)<br>Netherlands | $n = 179^f$<br>$M_{Age} = 60.4$<br>Head and Neck Cancer<br>Stage: I-IV<br>After treatment (surgery and/or radiotherapy and/or chemotherapy)                          | <b>EORTC QLQ-C30</b>                                                                                                  | Content: work on cognitions, social resources, work on emotions/relaxation (if indicated)<br>Setting: individually, face to face<br>Duration: 1 year<br>Session number: maximum 6 ( $M = 4.00$ )<br>Session length: 0.75-1h                                                     | Standard Care                                               |
| Vargas [121] (2014)<br>United States       | $n = 194$<br>$M_{Age} = 50.3$ (at diagnosis)<br>Breast Cancer<br>Stage: 0-III<br>During treatment (adjuvant radiotherapy and/or chemotherapy and/or hormone therapy) | <b>9-point Likert scale (fatigue intensity, fatigue-related daytime interference)</b>                                 | Content <sup>d</sup> : work on cognitions, work on behavior, social resources, relaxation, homework (workbook)<br>Setting: group-based, face to face<br>Duration: 10 weeks<br>Session number: 10 ( $M = 6.78$ )<br>Session length: 2h                                           | Attention Control<br>(one-day 6 h psycho-education session) |
| Xian [122] (2021)<br>China                 | $n = 119^f$<br>$M_{Age} = 60.7$<br>Colorectal Cancer<br>Stage: II-IV<br>During treatment (chemotherapy, partly surgery)                                              | <b>CFS-C (Total, Physical, Affective, Cognitive)</b>                                                                  | Content <sup>d</sup> : work on behavior, homework<br>Setting: individually, face to face<br>Duration: 24 weeks<br>Session number: 6<br>Session length: 0.5h                                                                                                                     | Standard Care                                               |
| Yates [123] (2005)<br>Australia            | $n = 104$<br>$M_{Age} = 49.4$<br>Breast Cancer<br>Stage: I-II<br>During treatment (adjuvant chemotherapy)                                                            | <b>FACT 11-Point Numeric Rating Scales</b> (worst, best, average fatigue)<br>R-PFS (distress, interference, severity) | Content <sup>d</sup> : CRF education, work on cognitions, work on behavior, social resources<br>Setting: individually, face to face and via telephone<br>Duration: 2 weeks<br>Session number: 3 (2 via telephone)<br>Session length: 10 min (telephone) - 20 min (face to face) | Attention Control<br>(general cancer education sessions)    |
| Yuen [124] (2006)<br>United States         | $n = 12^c$<br>$M_{Age} = 55.4$                                                                                                                                       | <b>PFS (total, affective meaning, work</b>                                                                            | Content <sup>d</sup> : work on behavior, homework (activity log)                                                                                                                                                                                                                | Standard Care                                               |

|                             |                                                                                                                                                            |                                                |                                                                                                                                                                                                                      |               |
|-----------------------------|------------------------------------------------------------------------------------------------------------------------------------------------------------|------------------------------------------------|----------------------------------------------------------------------------------------------------------------------------------------------------------------------------------------------------------------------|---------------|
|                             | Mixed Entities (not reported which)<br>Stage: not reported<br>After treatment (radiotherapy)                                                               | on behavior/severity, cognitive/mood, sensory) | Setting: individually, face to face and via telephone<br>Duration: 4 weeks<br>Session number: 4 (3 via telephone)<br>Session length: 1-2h (face to face); 15-30 minutes (telephone)                                  |               |
| Zhang [125] (2020)<br>China | <i>n</i> = 145<br><i>M</i> <sub>Age</sub> = 60.3<br>Colorectal Cancer<br>Stage: I-IV<br>After treatment (surgery and/or chemotherapy, and/or radiotherapy) | <b>EORTC QLQ-C30</b>                           | Content: work on cognitions, work on behavior, work on emotions, relaxation, homework (practice assignments)<br>Setting: individually, face to face<br>Duration: 3 months<br>Session number: 6<br>Session length: 1h | Standard Care |

Notes: EG = experimental group; M<sub>Age</sub>: Mean age of all participants at baseline; Instruments marked in bold were used for analyzing total fatigue scores; *n* refers to the total number of participants analyzed for fatigue assessment at post intervention.

a Instruments:

CFS-C: Cancer-Related Fatigue Scale

CIS-fat: Checklist Individual Strength (CIS) – Fatigue Subscale.

EORTC QLQ-C30: European Organization for Research and treatment of Cancer Core Quality of Life Questionnaire – Fatigue Scale

FACT-F: Functional Assessment of Cancer Therapy – Fatigue

FAQ: Fatigue Assessment Questionnaire

FQ: Norwegian Fatigue Questionnaire (Norwegian version of The Fatigue Formula).

FSI: Fatigue Symptom Inventory

LFS: Lee Fatigue Scale

MFA: Multidimensional Fatigue Assessment Questionnaire

MFI: Multidimensional Fatigue Inventory

PFS: Piper Fatigue Scale

POMS-F: Profile of Moods State - Fatigue Symptom Subscale.

R-PFS: Revised Piper Fatigue Scale

VAS: Visual Analog Scale

b Content:

CRF education: psychoeducative information on cancer-related fatigue.

work on cognitions: use of at least one therapeutic technique to establish more functional thinking patterns.

work on behavior: use of at least one therapeutic technique that rehearses more functional behavior.

work on emotions: advice and/or exercises to better cope with emotions.

social resources: activation of social resources through strengthening social support and/or communication training.

relaxation: therapeutic technique designed to put participants in a more relaxed state of mind, including mental imagery.

hypnosis: technique aimed at an altered state of consciousness, characterized by high susceptibility to external influence.



session number: indicated is the planned session number and, if indicated, average participation in sessions by participants in parentheses.  
c Participants had to report some degree of cancer-related fatigue as inclusion criteria.  
d Intervention focus was on cancer-related fatigue.  
e The information was not explicitly given in the manuscript but could be inferred.  
f Missing post-intervention values were imputed.

**Table S2.3.** Characteristics of included mindfulness-based interventions.

| Study<br>(Author +<br>Year +<br>Country)  | Description of<br>study population                                                                                                                                          | Instrument(s)<br>used to measure<br>fatigue <sup>a</sup> | Description of intervention <sup>b</sup>                                                                                                                                                                                                                                                                                                                                 | Description of<br>control                          |
|-------------------------------------------|-----------------------------------------------------------------------------------------------------------------------------------------------------------------------------|----------------------------------------------------------|--------------------------------------------------------------------------------------------------------------------------------------------------------------------------------------------------------------------------------------------------------------------------------------------------------------------------------------------------------------------------|----------------------------------------------------|
| Bower [126]<br>(2015)<br>United States    | <i>n</i> = 65<br><i>M</i> <sub>Age</sub> = 46.8<br>Breast Cancer<br>Stage: 0-III<br>After treatment<br>(chemotherapy,<br>radiotherapy, Herceptin<br>intake)                 | FSI (scale not<br>reported)                              | Content: meditation (experiential practice, gentle<br>movement exercises)<br>( <i>Mindful Awareness Practices program</i> )<br>Setting: group-based<br>Duration: 6 weeks<br>Session number: 6 ( <i>M</i> =5.24)<br>Session length: 2h<br>Additional home practice: yes (daily; practice<br>log)                                                                          | Wait-List<br>Control                               |
| Bower [127]<br>(2021)<br>United States    | <i>n</i> = 149<br><i>M</i> <sub>Age</sub> = 45.4<br>Breast Cancer<br>Stage: 0-III<br>After treatment<br>(surgery, radiotherapy,<br>chemotherapy, and/or<br>hormone therapy) | FSI (scale not<br>reported)                              | Content: meditation (experiential practice, gentle<br>movement exercises)<br>( <i>Mindful Awareness Practices program</i> )<br>Setting: group-based<br>Duration: 6 weeks (+4 and 8 weeks after the 6-<br>week program)<br>Session number: 6 ( <i>M</i> = 4.5) + 2 1h booster<br>sessions<br>Session length: 2h<br>Additional home practice: yes (daily; practice<br>log) | Wait-List<br>Control                               |
| Gok Metin [128]<br>(2019)<br>Turkey       | <i>n</i> = 61 <sup>c</sup><br><i>M</i> <sub>Age</sub> = 50.4<br>Breast Cancer<br>Stage: I-III<br>During treatment<br>(chemotherapy)                                         | BFI (severity,<br>interference)                          | Content: meditation (breathing)<br>( <i>Mindfulness meditation</i> )<br>Setting: individually<br>Duration: 12 weeks<br>Session number: 1 (+ daily text messages or<br>phone calls)<br>Session length: 0.67h<br>Additional home practice: yes (daily; reminder)                                                                                                           | Attention<br>Control<br>(one education<br>session) |
| Hoffman [129]<br>(2012)<br>United Kingdom | <i>n</i> = 214<br><i>M</i> <sub>Age</sub> = 49.6<br>Breast Cancer                                                                                                           | POMS-F                                                   | Content: meditation (body scan, sitting), yoga<br>exercises                                                                                                                                                                                                                                                                                                              | Wait-List<br>Control                               |

|                                            |                                                                                                                                                          |                                                                 |                                                                                                                                                                                                                                                                                                                      |                      |
|--------------------------------------------|----------------------------------------------------------------------------------------------------------------------------------------------------------|-----------------------------------------------------------------|----------------------------------------------------------------------------------------------------------------------------------------------------------------------------------------------------------------------------------------------------------------------------------------------------------------------|----------------------|
|                                            | Stage: 0-III<br>After treatment<br>(surgery, chemotherapy<br>and/or radiotherapy)                                                                        |                                                                 | ( <i>Mindfulness-based Stress Reduction</i> )<br>Setting: group-based<br>Duration: 8 weeks<br>Session number: 9 ( $M = 6.26$ , excluding 6h-session)<br>Session length: 2-2.25h plus one 6h-session<br>Additional home practice: yes (daily; practice log)                                                           |                      |
| Johns [130]<br>(2015)<br>United States     | $n = 35^d$<br>$M_{Age} = 57.3$<br>Mixed Entities<br>(85.7% Breast Cancer)<br>Stage: I-IV<br>After treatment<br>(chemotherapy, and/or<br>radiotherapy)    | <b>FSI (severity,<br/>interference,<br/>frequency)</b><br>SF-36 | Content: CRF education, meditation (body scan,<br>compassion, sitting, walking), yoga exercises<br>( <i>Mindfulness-based Stress Reduction – CRF</i> )<br>Setting: group-based<br>Duration: 7 weeks<br>Session number: 7 ( $M = 6.16$ )<br>Session length: 2h<br>Additional home practice: yes (daily; practice log) | Wait-List<br>Control |
| Lengacher [131]<br>(2012)<br>United States | $n = 82$<br>$M_{Age} =$ not reported<br>Breast Cancer<br>Stage: 0-III<br>After treatment<br>(adjuvant chemotherapy<br>and/or radiotherapy)               | <b>MDASI</b>                                                    | Content: meditation (body scan, sitting,<br>walking), yoga exercises<br>( <i>Mindfulness-based Stress Reduction (for Breast Cancer)</i> )<br>Setting: group-based<br>Duration: 6 weeks<br>Session number: 6<br>Session length: 2h<br>Additional home practice: yes (frequency not specified; no practice log)        | Wait-List<br>Control |
| Lengacher [132]<br>(2016)<br>United States | $n = 299$<br>$M_{Age} = 57.1$<br>Breast Cancer<br>Stage: 0-III<br>After treatment<br>(surgery, majority adjuvant<br>chemotherapy and/or<br>radiotherapy) | <b>FSI (severity,<br/>interference)</b>                         | Content: meditation (body scan, sitting,<br>walking), yoga exercises<br>( <i>Mindfulness-based Stress Reduction (for Breast Cancer)</i> )<br>Setting: group-based<br>Duration: 6 weeks<br>Session number: 6<br>Session length: 2h<br>Frequency: weekly                                                               | Wait-List<br>Control |

|                                 |                                                                                                                                                       |                          |                                                                                                                                                                                                                                                                                                                                                        |                   |
|---------------------------------|-------------------------------------------------------------------------------------------------------------------------------------------------------|--------------------------|--------------------------------------------------------------------------------------------------------------------------------------------------------------------------------------------------------------------------------------------------------------------------------------------------------------------------------------------------------|-------------------|
|                                 |                                                                                                                                                       |                          | Additional home practice: yes (frequency not specified; no practice log)                                                                                                                                                                                                                                                                               |                   |
| Liu [133]<br>(2019)<br>China    | $n = 102$<br>$M_{Age} = 42.8$<br>Thyroid Cancer<br>Stage: I-IV<br>During treatment<br>(thyroid hormone withdrawal, before radioactive iodine therapy) | <b>EORTC-QLQ-C30</b>     | Content: meditation (body scan, breathing, nonjudgmental awareness, sitting, walking), yoga exercises<br>( <i>Mindfulness-based Stress Reduction</i> )<br>Setting: group-based<br>Duration: 8 weeks<br>Session number: 8 ( $M = 6.76$ )<br>Session length: 2h <sup>f</sup><br>Additional home practice: yes (frequency not specified; no practice log) | Standard Care     |
| Ng [134]<br>(2021)<br>Malaysia  | $n = 78^d$<br>$M_{Age} = 54.6$<br>Haematological Cancers<br>(58.9% Lymphoma)<br>Stage: not reported<br>Treatment status: not reported                 | <b>FACIT-F</b><br>ESAS-F | Content <sup>e</sup> : meditation (breathing)<br>( <i>Mindful Breathing Session</i> )<br>Setting: individually<br>Duration: 1 day<br>Session number: 1<br>Session length: 0.75h <sup>f</sup><br>Additional home practice: no                                                                                                                           | Standard Care     |
| Park [135]<br>(2020)<br>Japan   | $n = 74^c$<br>$M_{Age} = 53.7$<br>Breast Cancer<br>Stage: 0-III<br>Treatment status: not reported                                                     | <b>BFI</b>               | Content: meditation (breathing, body scan, compassion, eating, walking), work on cognitions, yoga exercises<br>( <i>Mindfulness-based cognitive therapy</i> )<br>Setting: group-based<br>Duration: 8 weeks<br>Session number: 8<br>Session length: 2h<br>Additional home practice: yes (daily; practice log)                                           | Wait-List Control |
| Rahmani [136]<br>(2014)<br>Iran | $n = 24$<br>$M_{Age} = 43.7$<br>Breast Cancer<br>Stage: I-III<br>During treatment<br>(chemotherapy)                                                   | <b>EORTC-QLQ-C30</b>     | Content: meditation (breathing, body scan, eating, sitting), yoga exercises<br>( <i>Mindfulness-based Stress Reduction</i> )<br>Setting: group-based<br>Duration: 8 weeks<br>Session number: 8<br>Session length: 2h                                                                                                                                   | Standard Care     |

|                                                |                                                                                                                                                                                                                                                       |                           |                                                                                                                                                                                                                                                                                                                                                                         |                                                 |
|------------------------------------------------|-------------------------------------------------------------------------------------------------------------------------------------------------------------------------------------------------------------------------------------------------------|---------------------------|-------------------------------------------------------------------------------------------------------------------------------------------------------------------------------------------------------------------------------------------------------------------------------------------------------------------------------------------------------------------------|-------------------------------------------------|
| Additional home practice: no                   |                                                                                                                                                                                                                                                       |                           |                                                                                                                                                                                                                                                                                                                                                                         |                                                 |
| Sheikhzadeh [118]<br>(2021)<br>Iran            | $n = 39$<br>$M_{Age} = 47.8$<br>Breast Cancer (67.2%),<br>Lymphoma, Colon Cancer<br>Stage: not reported<br>(41.4% with metastasis)<br>Treatment status: not<br>reported<br>(chemotherapy, hormone<br>therapy, target therapy,<br>and/or radiotherapy) | CFS                       | Content: CRF education, meditation (body scan,<br>breathing, eating), work on cognitions<br><i>(Mindfulness Based Cognitive Therapy)</i><br>Setting: group-based<br>Duration: 8 weeks<br>Session number: 8<br>Session length: 1.5h<br>Additional home practice: no                                                                                                      | Wait-List<br>Control                            |
| Van der Gucht<br>[137] (2020)<br>Belgium       | $n = 25$<br>$M_{Age} = 45.5$<br>Breast Cancer<br>Stage: "early stage"<br>After treatment<br>(chemotherapy, partly<br>radiotherapy and/or<br>hormone therapy)                                                                                          | CIS - fatigue<br>severity | Content: meditation (body scan, breathing,<br>insight, walking), work on cognitions, yoga<br>exercises<br><i>(Mindfulness-Based Intervention)</i><br>Setting: group-based<br>Duration: 8 weeks<br>Session number: 4<br>Session length: 3h<br>Additional home practice: yes (daily; reminder)                                                                            | Wait-List<br>Control                            |
| Van der Lee [138]<br>(2012)<br>Netherlands     | $n = 83^d$<br>$M_{Age} = 51.3$<br>Mixed Entities<br>(63% Breast Cancer)<br>Stage: not reported<br>After treatment<br>(surgery, chemotherapy,<br>radiotherapy, and/or<br>hormone therapy)                                                              | CIS-fat                   | Content: CRF education, meditation (body scan,<br>breathing, compassion, eating), work on<br>cognitions<br><i>(Mindfulness-based Cognitive Therapy)</i><br>Setting: group-based<br>Duration: 9 weeks<br>Session number: 9 (+1 follow-up session) ( $M=8$ )<br>Session length: 2.5h and one 6h-session<br>Additional home practice: yes (6 days a week;<br>practice log) | Wait-List<br>Control                            |
| Witek Janusek<br>[139] (2019)<br>United States | $n = 137$<br>$M_{Age} = 55.1$<br>Breast Cancer<br>Stage: 0-III                                                                                                                                                                                        | MFSI-SF                   | Content: meditation (breathing, sitting, walking),<br>yoga exercises<br><i>(Mindfulness-based Stress Reduction)</i><br>Setting: group-based                                                                                                                                                                                                                             | Attention<br>Control<br>(educational<br>series) |

|                                                                                                                                                                                                                                                                                                                                                                                                                                                                                                                                                                                                                                                                                                                                                                                                                                                                                                                                                                                                                                                                                                                                                                                                                                                                                                                                                                                                                                                                                                                                                                                                                                                                                                                                                                                                                                                                                                                                                     |                                                                                                                                                                 |
|-----------------------------------------------------------------------------------------------------------------------------------------------------------------------------------------------------------------------------------------------------------------------------------------------------------------------------------------------------------------------------------------------------------------------------------------------------------------------------------------------------------------------------------------------------------------------------------------------------------------------------------------------------------------------------------------------------------------------------------------------------------------------------------------------------------------------------------------------------------------------------------------------------------------------------------------------------------------------------------------------------------------------------------------------------------------------------------------------------------------------------------------------------------------------------------------------------------------------------------------------------------------------------------------------------------------------------------------------------------------------------------------------------------------------------------------------------------------------------------------------------------------------------------------------------------------------------------------------------------------------------------------------------------------------------------------------------------------------------------------------------------------------------------------------------------------------------------------------------------------------------------------------------------------------------------------------------|-----------------------------------------------------------------------------------------------------------------------------------------------------------------|
| After/during treatment<br>(some with adjuvant<br>chemotherapy,<br>radiotherapy, and/or<br>hormone therapy)                                                                                                                                                                                                                                                                                                                                                                                                                                                                                                                                                                                                                                                                                                                                                                                                                                                                                                                                                                                                                                                                                                                                                                                                                                                                                                                                                                                                                                                                                                                                                                                                                                                                                                                                                                                                                                          | Duration: 8 weeks<br>Session number: 9<br>Session length: 2.5h and one 6h-session<br>Additional home practice: yes (no frequency<br>specified; no practice log) |
| <p>Notes: MAge: Mean age of all participants at baseline; <i>n</i> refers to the total number of participants analyzed for fatigue assessment at post intervention; instruments marked in bold were used for analyzing total fatigue scores.</p> <p>a Instruments:.</p> <p>BFI: Brief Fatigue Inventory</p> <p>CIS-fat: Checklist Individual Strength – Fatigue Severity Subscale.</p> <p>EORTC QLQ-C30: European Organization for Research and Treatment of Cancer Core Quality of Life Questionnaire – Fatigue Scale.</p> <p>ESAS: Edmonton Symptom Assessment System – Fatigue Subscale</p> <p>FACT-F: Functional Assessment of Cancer Therapy – Fatigue</p> <p>FSI: Fatigue Symptom Inventory</p> <p>MDASI: M.D. Anderson Symptom Inventory</p> <p>MFSI-SF: Multidimensional Fatigue Scale Inventory - Short Form</p> <p>POMS: Profile of Moods State - Fatigue Symptom Subscale</p> <p>SF-12: Medical Outcomes Study Short-Form Health Survey</p> <p>SF-36: Medical Outcomes Study Short-Form Health Survey.</p> <p>VAS: Visual Analog Scale.</p> <p>b Content:.</p> <p>CRF education: psychoeducative information on cancer-related fatigue.</p> <p>meditation: any mindfulness practice aimed at concentration on the present moment.</p> <p>body scan: mindfulness exercise in which attention is focused on different areas of the body.</p> <p>work on cognitions: explicit working on cognitions/thoughts according to Mindfulness-based Cognitive Therapy.</p> <p>yoga exercises: any yoga type.</p> <p>session number: planned session number and, if indicated, average participation in sessions by participants in parentheses.</p> <p>c Missing post-intervention values were imputed.</p> <p>d Participants had to report some degree of fatigue as inclusion criteria.</p> <p>e Intervention focus was on cancer-related fatigue.</p> <p>f The information was not explicitly given in the manuscript but could be inferred.</p> |                                                                                                                                                                 |

## References

71. Banasik, J.; Williams, H.; Haberman, M.; Blank, S.E.; Bendel, R. Effect of iyengar yoga practice on fatigue and diurnal salivary cortisol concentration in breast cancer survivors. *J Am Acad Nurse Pract* **2011**, *23*, 135-142.
72. Chandwani, K.D.; Perkins, G.; Nagendra, H.R.; Raghuram, N.V.; Spelman, A.; Nagarathna, R.; Johnson, K.; Fortier, A.; Arun, B.; Wei, Q., *et al.* Randomized, controlled trial of yoga in women with breast cancer undergoing radiotherapy. *J Clin Oncol* **2014**, *32*, 1058-1065.
73. Chandwani, K.D.; Thornton, B.; Perkins, G.H.; Arun, B.; Raghuram, N.V.; Nagendra, H.R.; Wei, Q.; Cohen, L. Yoga improves quality of life and benefit finding in women undergoing radiotherapy for breast cancer. *J Soc Integr Oncol* **2010**, *8*, 43-55.
74. Chaoul, A.; Milbury, K.; Spelman, A.; Basen-Engquist, K.; Hall, M.H.; Wei, Q.; Shih, Y.-C.T.; Arun, B.; Valero, V.; Perkins, G.H., *et al.* Randomized trial of tibetan yoga in patients with breast cancer undergoing chemotherapy. *Cancer* **2018**, *124*, 36-45.
75. Cohen, L.; Warneke, C.; Fouladi, R.T.; Rodriguez, M.A.; Chaoul-Reich, A. Psychological adjustment and sleep quality in a randomized trial of the effects of a tibetan yoga intervention in patients with lymphoma. *Cancer* **2004**, *100*, 2253-2260.
76. Cramer, H.; Pokhrel, B.; Fester, C.; Meier, B.; Gass, F.; Lauche, R.; Eggleston, B.; Walz, M.; Michalsen, A.; Kunz, R., *et al.* A randomized controlled bicenter trial of yoga for patients with colorectal cancer. *Psychooncology* **2016**, *25*, 412-420.
77. Cramer, H.; Rabsilber, S.; Lauche, R.; Kümmel, S.; Dobos, G. Yoga and meditation for menopausal symptoms in breast cancer survivors-a randomized controlled trial. *Cancer* **2015**, *121*, 2175-2184.
78. Danhauer, S.C.; Mihalko, S.L.; Russell, G.B.; Campbell, C.R.; Felder, L.; Daley, K.; Levine, E.A. Restorative yoga for women with breast cancer: Findings from a randomized pilot study. *Psychooncology* **2009**, *18*, 360-368.
79. Dhruva, A.; Miaskowski, C.; Abrams, D.; Acree, M.; Cooper, B.; Goodman, S.; Hecht, F.M. Yoga breathing for cancer chemotherapy-associated symptoms and quality of life: Results of a pilot randomized controlled trial. *J Altern Complement Med* **2012**, *18*, 473-479.
80. Jong, M.C.; Boers, I.; Schouten van der Velden, A.P.; Meij, S.V.; Göker, E.; Timmer-Bonte, A.; van Wietmarschen, H.A. A randomized study of yoga for fatigue and quality of life in women with breast cancer undergoing (neo) adjuvant chemotherapy. *J Altern Complement Med* **2018**, *24*, 942-953.
81. Kiecolt-Glaser, J.K.; Bennett, J.M.; Andridge, R.; Peng, J.; Shapiro, C.L.; Malarkey, W.B.; Emery, C.F.; Layman, R.; Mrozek, E.E.; Glaser, R. Yoga's impact on inflammation, mood, and fatigue in breast cancer survivors: A randomized controlled trial. *J Clin Oncol* **2014**, *32*, 1040-1049.
82. Lin, P.J.; Kleckner, I.R.; Loh, K.P.; Inglis, J.E.; Peppone, L.J.; Janelins, M.C.; Kamen, C.S.; Heckler, C.E.; Culakova, E.; Pigeon, W.R., *et al.* Influence of yoga on cancer-related fatigue and on mediational relationships between changes in sleep and cancer-related fatigue: A nationwide, multicenter randomized controlled trial of yoga in cancer survivors. *Integr Cancer Ther* **2019**, *18*, 1-11.
83. Littman, A.J.; Bertram, L.C.; Ceballos, R.; Ulrich, C.M.; Ramaprasad, J.; McGregor, B.; McTiernan, A. Randomized controlled pilot trial of yoga in overweight and obese breast cancer survivors: Effects on quality of life and anthropometric measures. *Support Care Cancer* **2012**, *20*, 267-277.
84. Loudon, A.; Barnett, T.; Piller, N.; Immink, M.A.; Williams, A.D. Yoga management of breast cancer-related lymphoedema: A randomised controlled pilot-trial. *BMC Complement Altern Med* **2014**, *14*, 214.
85. Moadel, A.B.; Shah, C.; Wylie-Rosett, J.; Harris, M.S.; Patel, S.R.; Hall, C.B.; Sparano, J.A. Randomized controlled trial of yoga among a multiethnic sample of breast cancer patients: Effects on quality of life. *J Clin Oncol* **2007**, *25*, 4387-4395.
86. Pasyar, N.; Barshan Tashnizi, N.; Mansouri, P.; Tahmasebi, S. Effect of yoga exercise on the quality of life and upper extremity volume among women with breast cancer related lymphedema: A pilot study. *Eur J Oncol Nurs* **2019**, *42*, 103-109.
87. Prakash, K.; Saini, S.K.; Pugazhendhi, S. Effectiveness of yoga on quality of life of breast cancer patients undergoing chemotherapy: A randomized clinical controlled study. *Indian J Palliat Care* **2020**, *26*, 323-331.
88. Pruthi, S.; Stan, D.L.; Jenkins, S.M.; Huebner, M.; Borg, B.A.; Thomley, B.S.; Cutshall, S.M.; Singh, R.; Kohli, S.; Boughey, J.C., *et al.* A randomized controlled pilot study assessing feasibility and impact of yoga practice on quality of life, mood, and perceived stress in women with newly diagnosed breast cancer. *Glob Adv Health Med* **2012**, *1*, 30-35.

89. Sohl, S.J.; Danhauer, S.C.; Birdee, G.S.; Nicklas, B.J.; Yacoub, G.; Aklilu, M.; Avis, N.E. A brief yoga intervention implemented during chemotherapy: A randomized controlled pilot study. *Complement Ther Med* **2016**, *25*, 139-142.
90. Sohl, S.J.; Tooze, J.A.; Johnson, E.N.; Ridner, S.H.; Rothman, R.L.; Lima, C.R.; Ansley, K.C.; Wheeler, A.; Nicklas, B.; Avis, N.E., *et al.* A randomized controlled pilot study of yoga skills training versus an attention control delivered during chemotherapy administration. *J Pain Symptom Manag* **2022**, *63*, 23-32.
91. Taso, C.J.; Lin, H.S.; Lin, W.L.; Chen, S.M.; Huang, W.T.; Chen, S.W. The effect of yoga exercise on improving depression, anxiety, and fatigue in women with breast cancer: A randomized controlled trial. *J Nurs Res* **2014**, *22*, 155-164.
92. Taylor, T.R.; Barrow, J.; Makambi, K.; Sheppard, V.; Wallington, S.F.; Martin, C.; Greene, D.; Yeruva, S.L.H.; Horton, S. A restorative yoga intervention for african-american breast cancer survivors: A pilot study. *J Racial Ethn Health Disparities* **2018**, *5*, 62-72.
93. Vadiraja, S.H.; Rao, M.R.; Nagendra, R.H.; Nagarathna, R.; Rekha, M.; Vanitha, N.; Gopinath, S.K.; Srinath, B.; Vishweshwara, M.; Madhavi, Y., *et al.* Effects of yoga on symptom management in breast cancer patients: A randomized controlled trial. *Int J Yoga Therap* **2009**, *2*, 73-79.
94. Zetzl, T.; Renner, A.; Pittig, A.; Jentschke, E.; Roch, C.; van Oorschot, B. Yoga effectively reduces fatigue and symptoms of depression in patients with different types of cancer. *Support Care Cancer* **2021**, *29*, 2973-2982.
95. Zhi, W.I.; Baser, R.E.; Zhi, L.M.; Talukder, D.; Li, Q.S.; Paul, T.; Patterson, C.; Piulson, L.; Seluzicki, C.; Galantino, M.L., *et al.* Yoga for cancer survivors with chemotherapy-induced peripheral neuropathy: Health-related quality of life outcomes. *Cancer Med* **2021**, *10*, 5456-5465.
96. Andersen, B.L.; Farrar, W.B.; Golden-Kreutz, D.M.; Glaser, R.; Emery, C.F.; Crespín, T.R.; Shapiro, C.L.; Carson, W.E., 3rd. Psychological, behavioral, and immune changes after a psychological intervention: A clinical trial. *J Clin Oncol* **2004**, *22*, 3570-3580.
97. Armes, J.; Chalder, T.; Addington-Hall, J.; Richardson, A.; Hotopf, M. A randomized controlled trial to evaluate the effectiveness of a brief, behaviorally oriented intervention for cancer-related fatigue. *Cancer* **2007**, *110*, 1385-1395.
98. Arving, C.; Sjöden, P.O.; Bergh, J.; Hellbom, M.; Johansson, B.; Glimelius, B.; Brandberg, Y. Individual psychosocial support for breast cancer patients: A randomized study of nurse versus psychologist interventions and standard care. *Cancer nursing* **2007**, *30*, E10-19.
99. Bourmaud, A.; Anota, A.; Moncharmont, C.; Tinquaut, F.; Oriol, M.; Trillet-Lenoir, V.; Bajard, A.; Parnalland, S.; Rotonda, C.; Bonnetain, F., *et al.* Cancer-related fatigue management: Evaluation of a patient education program with a large-scale randomised controlled trial, the peps fatigue study. *Br J Cancer* **2017**, *116*, 849-858.
100. Cohen, M.; Fried, G. Comparing relaxation training and cognitive-behavioral group therapy for women with breast cancer. *Research on Social Work Practice* **2007**, *17*, 313-323.
101. Courtier, N.; Armes, J.; Smith, A.; Radley, L.; Hopkinson, J.B. Targeted self-management limits fatigue for women undergoing radiotherapy for early breast cancer: Results from the active randomised feasibility trial. *Support Care Cancer* **2022**, *30*, 389-400.
102. Dolbeault, S.; Cayrou, S.; Brédart, A.; Viala, A.L.; Desclaux, B.; Saltel, P.; Gauvain-Piquard, A.; Hardy, P.; Dickes, P. The effectiveness of a psycho-educational group after early-stage breast cancer treatment: Results of a randomized french study. *Psychooncology* **2009**, *18*, 647-656.
103. Fukui, S.; Kugaya, A.; Okamura, H.; Kamiya, M.; Koike, M.; Nakanishi, T.; Imoto, S.; Kanagawa, K.; Uchitomi, Y. A psychosocial group intervention for japanese women with primary breast carcinoma. *Cancer* **2000**, *89*, 1026-1036.
104. Gaston-Johansson, F.; Fall-Dickson, J.M.; Nanda, J.; Ohly, K.V.; Stillman, S.; Krumm, S.; Kennedy, M.J. The effectiveness of the comprehensive coping strategy program on clinical outcomes in breast cancer autologous bone marrow transplantation. *Cancer nursing* **2000**, *23*, 277-285.
105. Godino, C.; Jodar, L.; Durán, A.; Martínez, I.; Schiaffino, A. Nursing education as an intervention to decrease fatigue perception in oncology patients. *Eur J Oncol Nurs* **2006**, *10*, 150-155.
106. Goedendorp, M.M.; Peters, M.E.; Gielissen, M.F.; Witjes, J.A.; Leer, J.W.; Verhagen, C.A.; Bleijenbergh, G. Is increasing physical activity necessary to diminish fatigue during cancer treatment? Comparing cognitive behavior therapy and a brief nursing intervention with usual care in a multicenter randomized controlled trial. *Oncologist* **2010**, *15*, 1122-1132.
107. Grégoire, C.; Faymonville, M.E.; Vanhaudenhuyse, A.; Charland-Verville, V.; Jerusalem, G.; Willems, S.; Bragard, I. Effects of an intervention combining self-care and self-hypnosis on fatigue and associated symptoms in post-treatment cancer patients: A randomized-controlled trial. *Psychooncology* **2020**, *29*, 1165-1173.



108. Kim, Y.H.; Choi, K.S.; Han, K.; Kim, H.W. A psychological intervention programme for patients with breast cancer under chemotherapy and at a high risk of depression: A randomised clinical trial. *J Clin Nurs* **2018**, *27*, 572-581.
109. Montgomery, G.H.; David, D.; Kangas, M.; Green, S.; Sucala, M.; Bovbjerg, D.H.; Hallquist, M.N.; Schnur, J.B. Randomized controlled trial of a cognitive-behavioral therapy plus hypnosis intervention to control fatigue in patients undergoing radiotherapy for breast cancer. *J Clin Oncol* **2014**, *32*, 557-563.
110. O'Brien, L.; Loughnan, A.; Purcell, A.; Haines, T. Education for cancer-related fatigue: Could talking about it make people more likely to report it? *Support Care Cancer* **2014**, *22*, 209-215.
111. Peng, W.; Zhang, H.; Li, Z. Responses of lung cancer survivors undergoing gamma knife surgery to supportive group psychotherapy. *Medicine* **2019**, *98*, e14693.
112. Purcell, A.; Fleming, J.; Burmeister, B.; Bennett, S.; Haines, T. Is education an effective management strategy for reducing cancer-related fatigue? *Support Care Cancer* **2011**, *19*, 1429-1439.
113. Ream, E.; Richardson, A.; Alexander-Dann, C. Supportive intervention for fatigue in patients undergoing chemotherapy: A randomized controlled trial. *J Pain Symptom Manag* **2006**, *31*, 148-161.
114. Reif, K.; de Vries, U.; Petermann, F.; Görres, S. A patient education program is effective in reducing cancer-related fatigue: A multi-centre randomised two-group waiting-list controlled intervention trial. *Eur J Oncol Nurs* **2013**, *17*, 204-213.
115. Sadeghi, E.; Gozali, N.; Moghaddam Tabrizi, F. Effects of energy conservation strategies on cancer related fatigue and health promotion lifestyle in breast cancersurvivors: A randomized control trial. *Asian Pac J Cancer Prev* **2016**, *17*, 4783-4790.
116. Salvetti, M.G.; Donato, S.C.T.; Machado, C.S.P.; de Almeida, N.G.; Santos, D.V.D.; Kurita, G.P. Psychoeducational nursing intervention for symptom management in cancer patients: A randomized clinical trial. *Asia Pac J Oncol Nurs* **2021**, *8*, 156-163.
117. Schjolberg, T.K.; Dodd, M.; Henriksen, N.; Asplund, K.; Cvancarova Småstuen, M.; Rustoen, T. Effects of an educational intervention for managing fatigue in women with early stage breast cancer. *Eur J Oncol Nurs* **2014**, *18*, 286-294.
118. Sheikhzadeh, M.; Zanjani, Z.; Baari, A. Efficacy of mindfulness-based cognitive therapy and cognitive behavioral therapy for anxiety, depression, and fatigue in cancer patients: A randomized clinical trial. *Iran J Psychiatry* **2021**, *16*, 271-280.
119. Tu, M.; Wang, F.; Shen, S.; Wang, H.; Feng, J. Influences of psychological intervention on negative emotion, cancer-related fatigue and level of hope in lung cancer chemotherapy patients based on the perma framework. *Iran J Public Health* **2021**, *50*, 728-736.
120. van der Meulen, I.C.; May, A.M.; de Leeuw, J.R.; Koole, R.; Oosterom, M.; Hordijk, G.J.; Ros, W.J. Long-term effect of a nurse-led psychosocial intervention on health-related quality of life in patients with head and neck cancer: A randomised controlled trial. *Br J Cancer* **2014**, *110*, 593-601.
121. Vargas, S.; Antoni, M.H.; Carver, C.S.; Lechner, S.C.; Wohlgemuth, W.; Llabre, M.; Blomberg, B.B.; Glück, S.; DerHagopian, R.P. Sleep quality and fatigue after a stress management intervention for women with early-stage breast cancer in southern florida. *Int J Behav Med* **2014**, *21*, 971-981.
122. Xian, X.; Zhu, C.; Chen, Y.; Huang, B.; Xiang, W. Effect of solution-focused therapy on cancer-related fatigue in patients with colorectal cancer undergoing chemotherapy: A randomized controlled trial. *Cancer nursing* **2021**.
123. Yates, P.; Aranda, S.; Hargraves, M.; Mirolo, B.; Clavarino, A.; McLachlan, S.; Skerman, H. Randomized controlled trial of an educational intervention for managing fatigue in women receiving adjuvant chemotherapy for early-stage breast cancer. *J Clin Oncol* **2005**, *23*, 6027-6036.
124. Yuen, H.K.; Mitcham, M.; Morgan, L. Managing post-therapy fatigue for cancer survivors using energy conservation training. *J Allied Health* **2006**, *35*, 121e-139e.
125. Zhang, X.; Liu, J.; Zhu, H.; Zhang, X.; Jiang, Y.; Zhang, J. Effect of psychological intervention on quality of life and psychological outcomes of colorectal cancer patients. *Psychiatry* **2020**, *83*, 58-69.
126. Bower, J.E.; Crosswell, A.D.; Stanton, A.L.; Crespi, C.M.; Winston, D.; Arevalo, J.; Ma, J.; Cole, S.W.; Ganz, P.A. Mindfulness meditation for younger breast cancer survivors: A randomized controlled trial. *Cancer* **2015**, *121*, 1231-1240.
127. Bower, J.E.; Partridge, A.H.; Wolff, A.C.; Thorner, E.D.; Irwin, M.R.; Joffe, H.; Petersen, L.; Crespi, C.M.; Ganz, P.A. Targeting depressive symptoms in younger breast cancer survivors: The pathways to wellness randomized controlled trial of mindfulness meditation and survivorship education. *J Clin Oncol* **2021**, *39*, 3473-3484.

128. Gok Metin, Z.; Karadas, C.; Izgu, N.; Ozdemir, L.; Demirci, U. Effects of progressive muscle relaxation and mindfulness meditation on fatigue, coping styles, and quality of life in early breast cancer patients: An assessor blinded, three-arm, randomized controlled trial. *Eur J Oncol Nurs* **2019**, *42*, 116-125.
129. Hoffman, C.J.; Ersser, S.J.; Hopkinson, J.B.; Nicholls, P.G.; Harrington, J.E.; Thomas, P.W. Effectiveness of mindfulness-based stress reduction in mood, breast- and endocrine-related quality of life, and well-being in stage 0 to iii breast cancer: A randomized, controlled trial. *J Clin Oncol* **2012**, *30*, 1335-1342.
130. Johns, S.A.; Brown, L.F.; Beck-Coon, K.; Monahan, P.O.; Tong, Y.; Kroenke, K. Randomized controlled pilot study of mindfulness-based stress reduction for persistently fatigued cancer survivors. *Psychooncology* **2015**, *24*, 885-893.
131. Lengacher, C.A.; Reich, R.R.; Post-White, J.; Moscoso, M.; Shelton, M.M.; Barta, M.; Le, N.; Budhrani, P. Mindfulness based stress reduction in post-treatment breast cancer patients: An examination of symptoms and symptom clusters. *J Behav Med* **2012**, *35*, 86-94.
132. Lengacher, C.A.; Reich, R.R.; Paterson, C.L.; Ramesar, S.; Park, J.Y.; Alinat, C.; Johnson-Mallard, V.; Moscoso, M.; Budhrani-Shani, P.; Miladinovic, B., *et al.* Examination of broad symptom improvement resulting from mindfulness-based stress reduction in breast cancer survivors: A randomized controlled trial. *J Clin Oncol* **2016**, *34*, 2827-2834.
133. Liu, T.; Zhang, W.; Xiao, S.; Xu, L.; Wen, Q.; Bai, L.; Ma, Q.; Ji, B. Mindfulness-based stress reduction in patients with differentiated thyroid cancer receiving radioactive iodine therapy: A randomized controlled trial. *Cancer Manag Res* **2019**, *11*, 467-474.
134. Ng, D.L.; Gan, G.G.; Anuar, N.A.; Tung, Y.Z.; Lai, N.Z.; Tan, Y.W.; Said, S.N.M.; Madihie, A.; Chai, C.S.; Tan, S.B. The effect of a single session of 30-min mindful breathing in reducing fatigue among patients with haematological cancer - a randomised controlled trial. *BMC Palliat Care* **2021**, *20*, 160.
135. Park, S.; Sato, Y.; Takita, Y.; Tamura, N.; Ninomiya, A.; Kosugi, T.; Sado, M.; Nakagawa, A.; Takahashi, M.; Hayashida, T., *et al.* Mindfulness-based cognitive therapy for psychological distress, fear of cancer recurrence, fatigue, spiritual well-being, and quality of life in patients with breast cancer-a randomized controlled trial. *J Pain Symptom Manag* **2020**, *60*, 381-389.
136. Rahmani, S.; Talepasand, S.; Ghanbary-Motlagh, A. Comparison of effectiveness of the metacognition treatment and the mindfulness-based stress reduction treatment on global and specific life quality of women with breast cancer. *Iran J Cancer Prev* **2014**, *7*, 184-196.
137. Van der Gucht, K.; Ahmadoun, S.; Melis, M.; de Cloe, E.; Sleurs, C.; Radwan, A.; Blommaert, J.; Takano, K.; Vandenbulcke, M.; Wildiers, H., *et al.* Effects of a mindfulness-based intervention on cancer-related cognitive impairment: Results of a randomized controlled functional magnetic resonance imaging pilot study. *Cancer* **2020**, *126*, 4246-4255.
138. van der Lee, M.L.; Garssen, B. Mindfulness-based cognitive therapy reduces chronic cancer-related fatigue: A treatment study. *Psychooncology* **2012**, *21*, 264-272.
139. Witek Janusek, L.; Tell, D.; Mathews, H.L. Mindfulness based stress reduction provides psychological benefit and restores immune function of women newly diagnosed with breast cancer: A randomized trial with active control. *Brain Behav Immun* **2019**, *80*, 358-373.
