# Supplementary material for: Meta-Analysis of Randomized Controlled Trials on Yoga, Psychosocial, and Mindfulness-Based Interventions for Cancer-Related Fatigue: What Intervention Characteristics Are Related to Higher Efficacy?
Source: MDPI journal article supplement (doi:10.3390/cancers14082016), 2022-04-15
Supplement: s1 [file s1]

## Section S6.1.Yoga Interventions

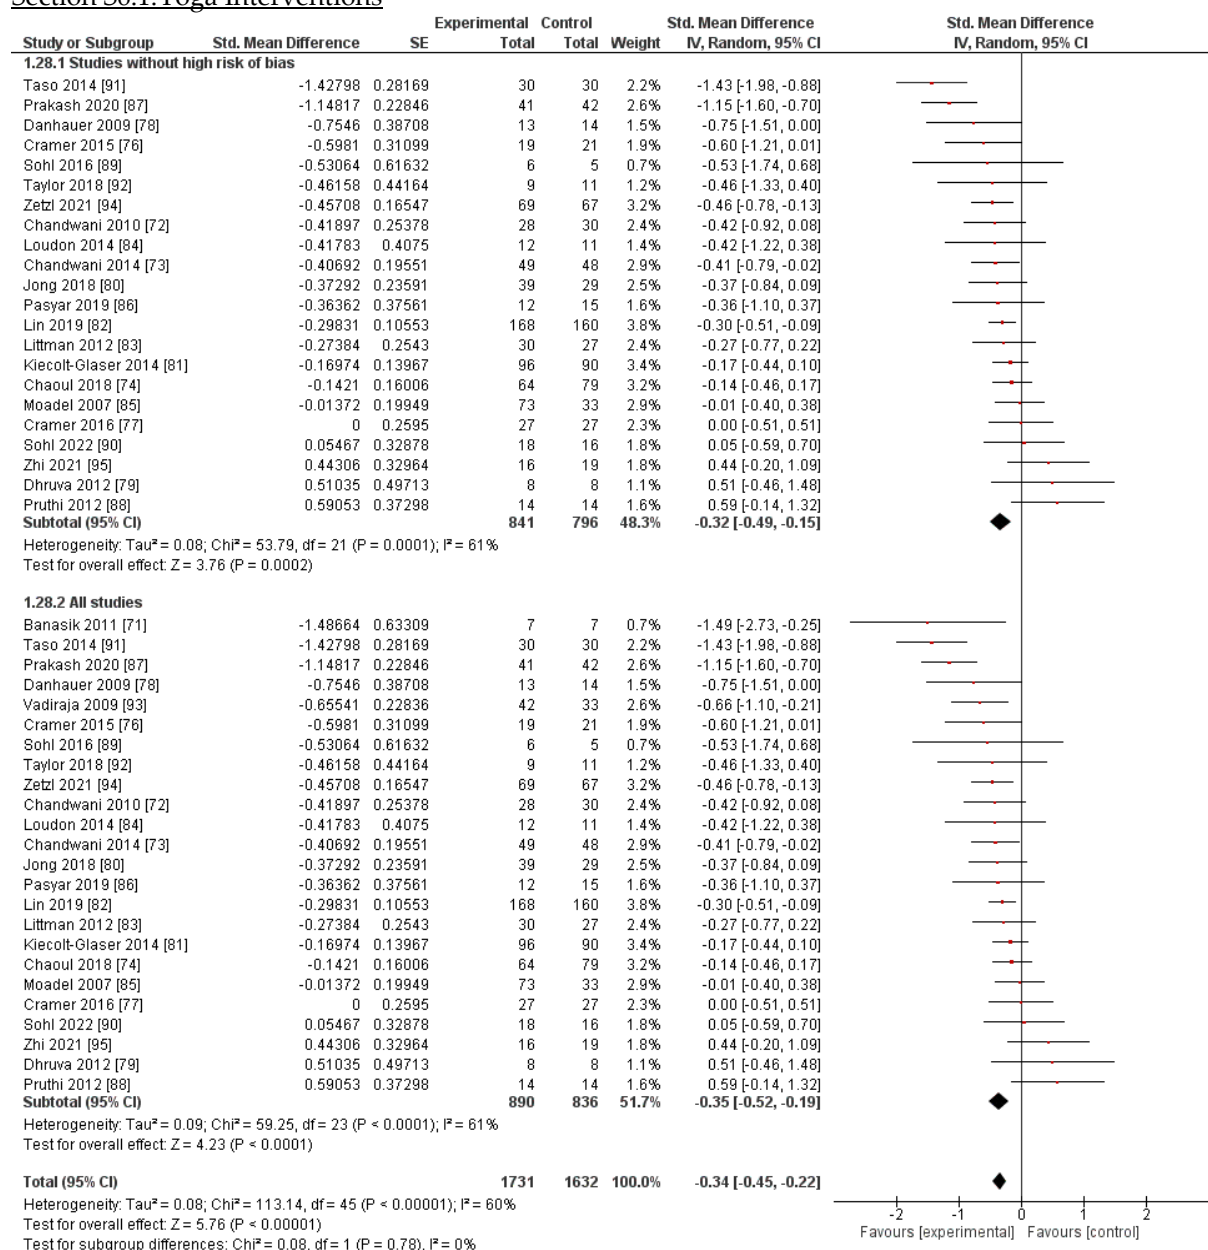

**Figure S6.1.1.** Sensitivity analysis for the comparison of the effect of yoga interventions without high risk of bias vs. all studies. *Note:* High risk of bias was defined as at least one assessed high risk besides blinding of participants and personnel as well as blinding of outcome assessment.

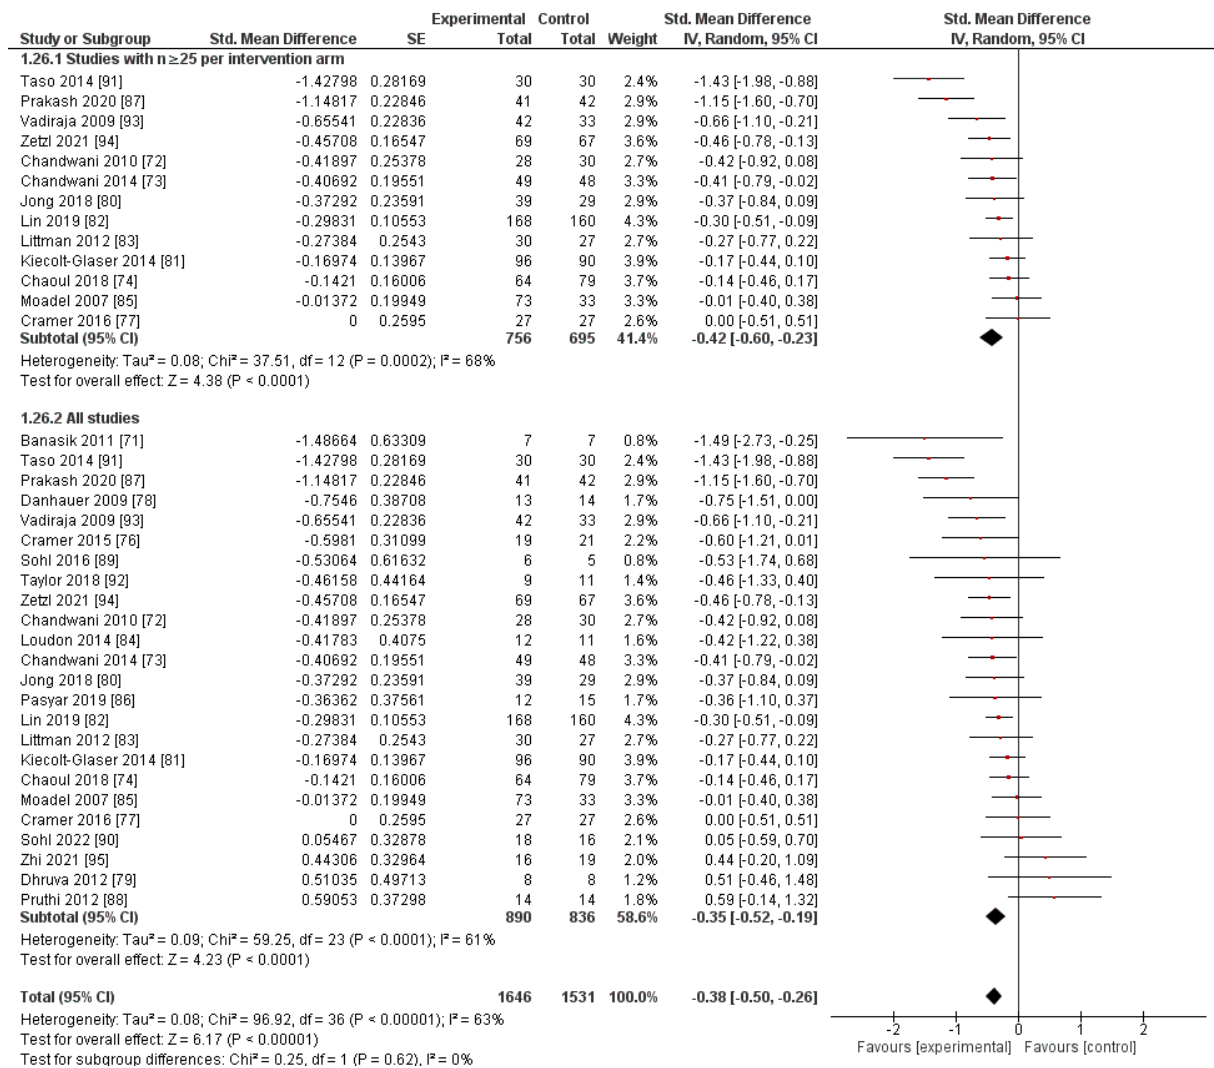

**Figure S6.1.2.** Sensitivity analysis for the comparison of the effect of yoga interventions with more than 25 patients per intervention arm vs. all studies.

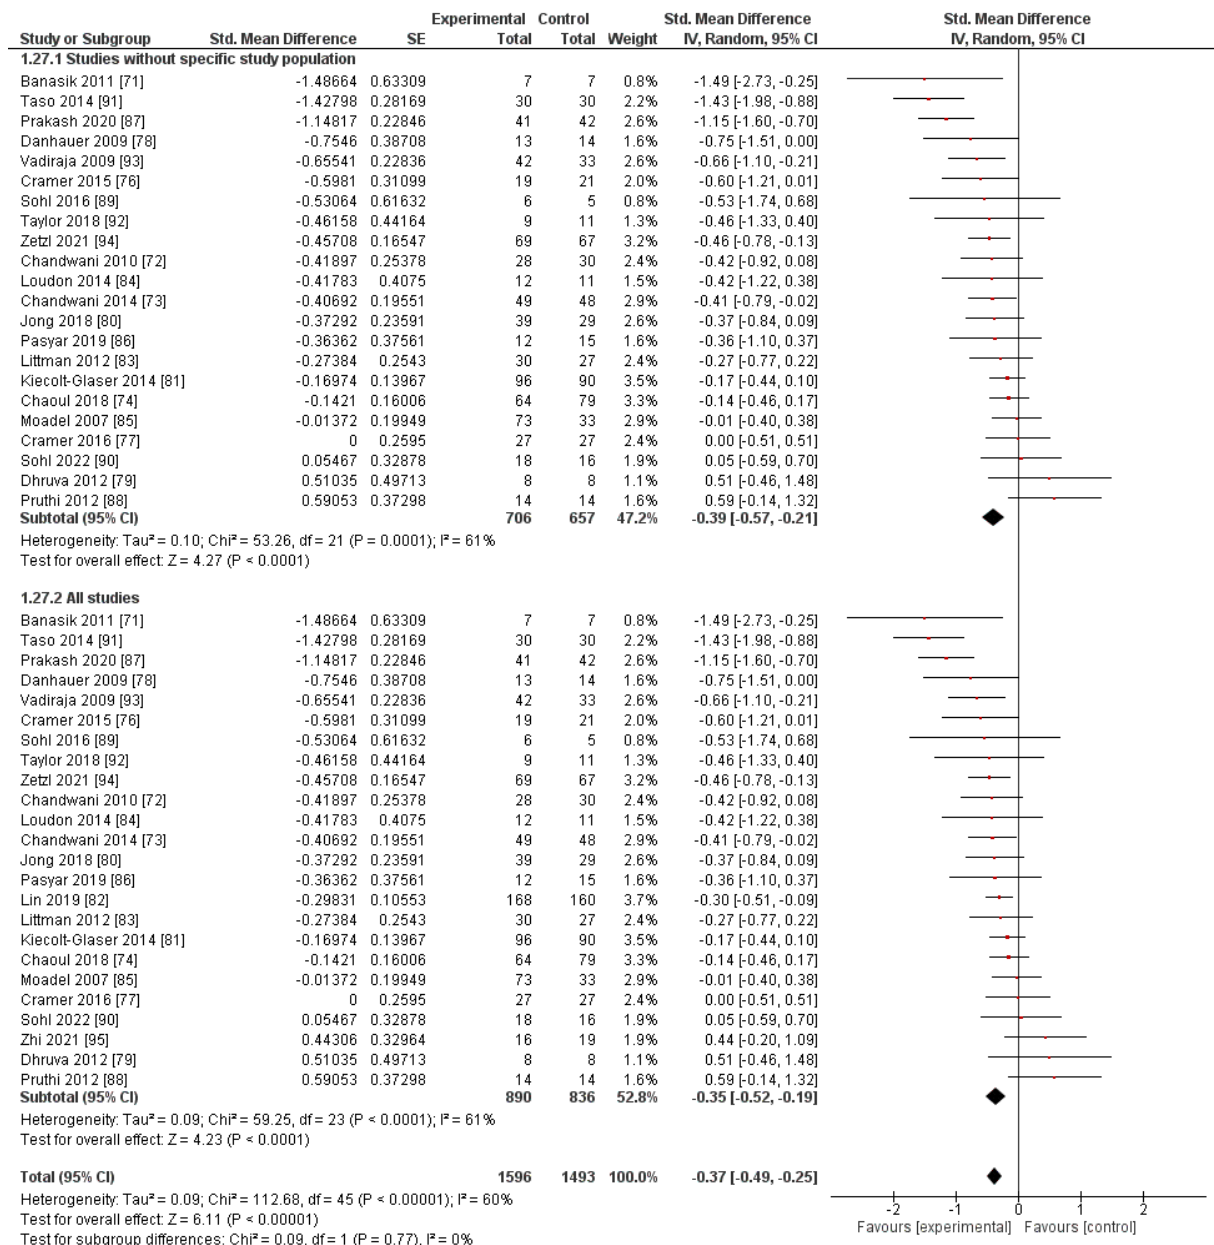

**Figure S6.1.3.** Sensitivity analysis for the comparison of yoga interventions including study populations without specific physical or mental impairment vs. all studies. *Note:* Lin (2019) [82] specifically included study participants with sleep disturbances; Zhi (2021) [95] with chemotherapy-induced peripheral neuropathy.

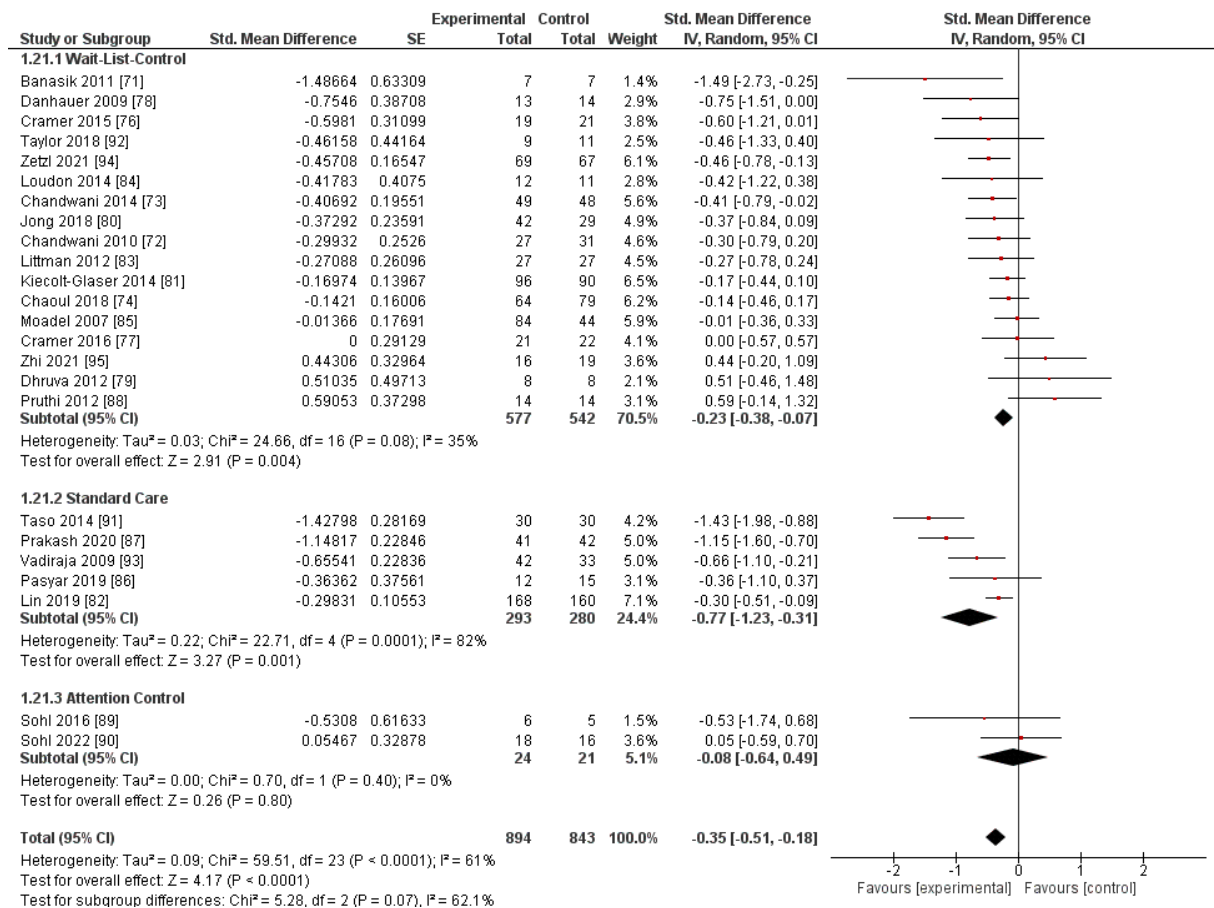

**Figure S6.1.4.** Comparison of effects of yoga interventions with different control groups (waitlist-control vs. standard care vs. vs. attention control).

## Section S6.2. Psychosocial Interventions

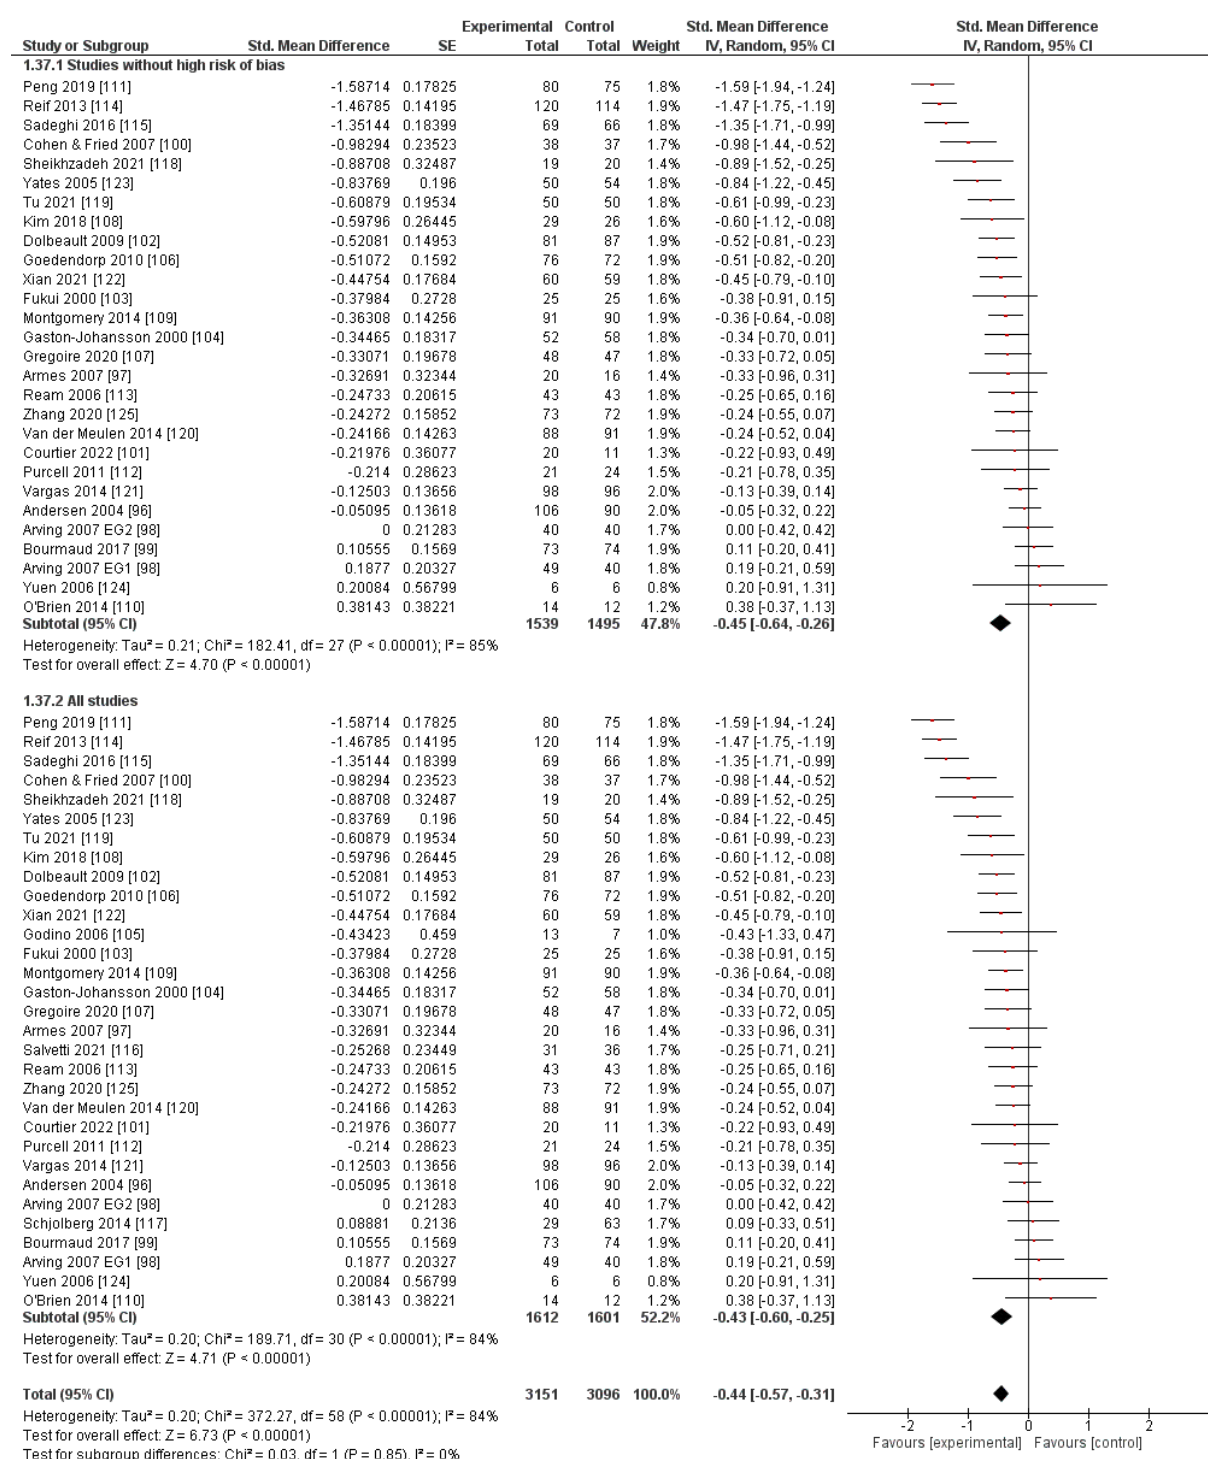

**Figure S6.2.1.** Sensitivity analysis for the comparison of the effect of psychosocial interventions without high risk of bias vs. all studies. *Note:* High risk of bias was defined as at least one assessed high risk besides blinding of participants and personnel as well as blinding of outcome assessment.

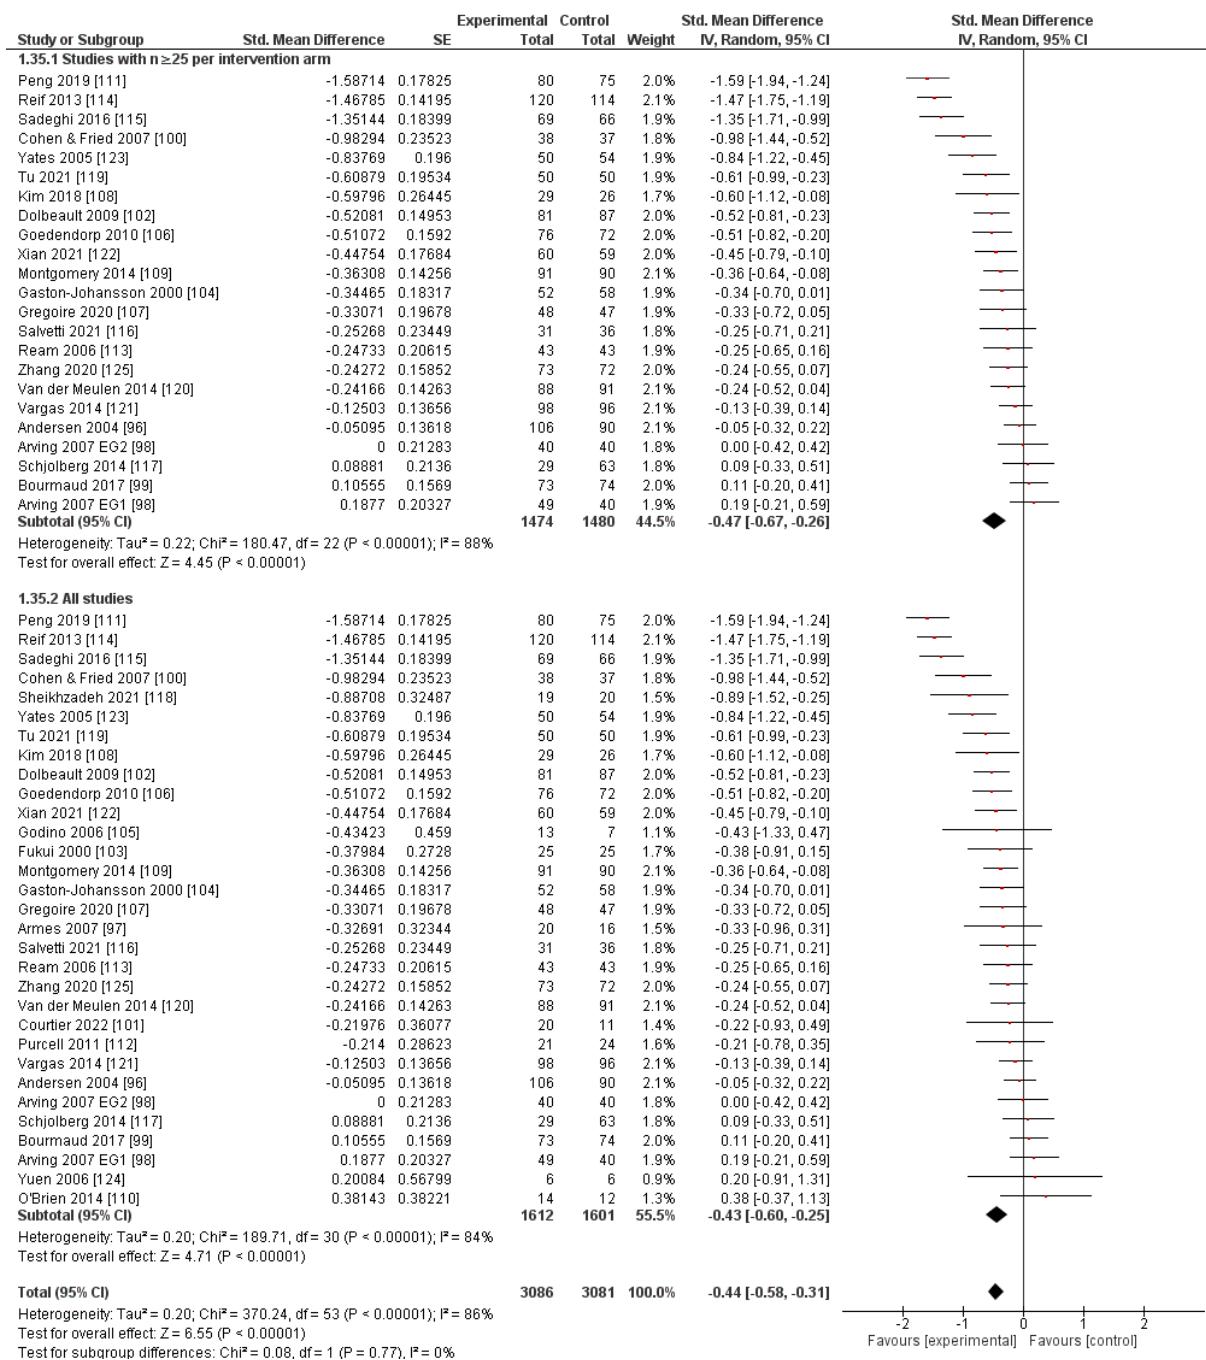

**Figure S6.2.2.** Sensitivity analysis for the comparison of the effect of psychosocial interventions with more than 25 patients per intervention arm vs. all studies.

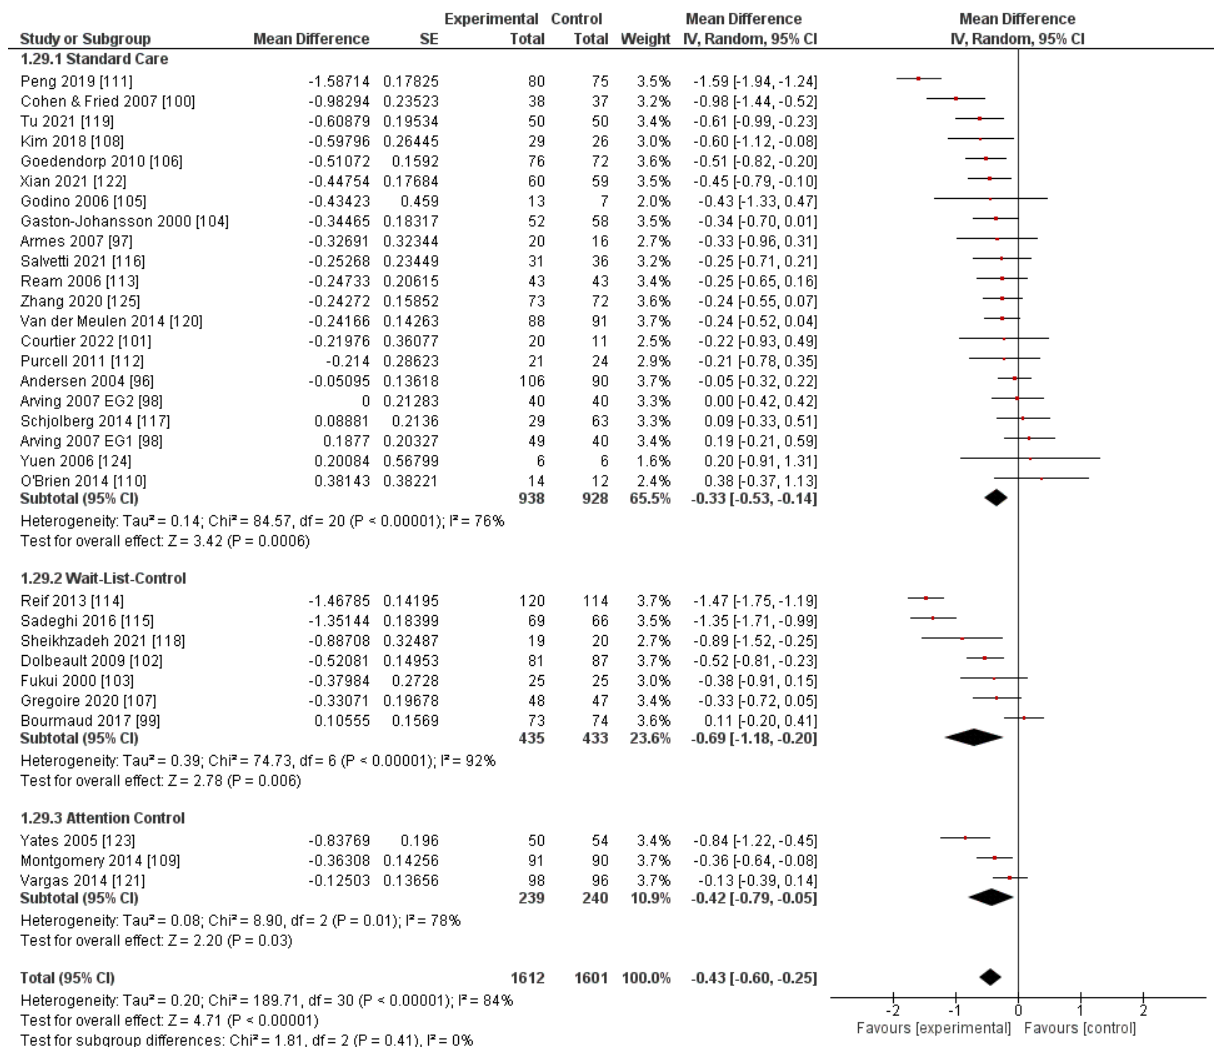

**Figure S6.2.3.** Comparison of effects of psychosocial interventions with different control groups (standard care vs. waitlist-control vs. attention control).

*General note:* For psychosocial interventions, we did not perform a sensitivity analysis with respect to a specific study population because this only concerned the study from Kim (2018 [108]; study population at high risk for depression), whose SMD was close to the mean effect (SMD = -0.60; 95% CI -1.12, -0.08).

## Section S6.3. Mindfulness-based Interventions

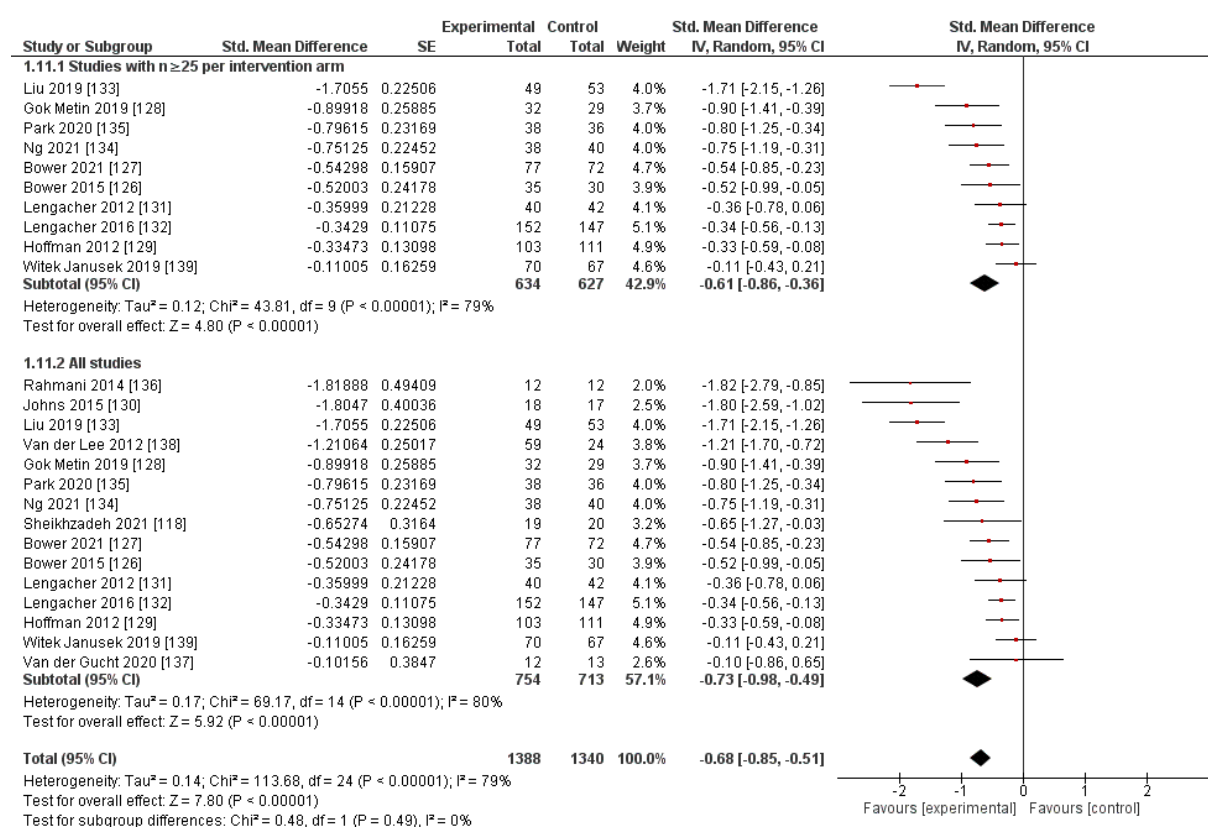

**Figure S6.3.1.** Sensitivity analysis for the comparison of the effect of mindfulness-based interventions with more than 25 patients per intervention arm vs. all studies.



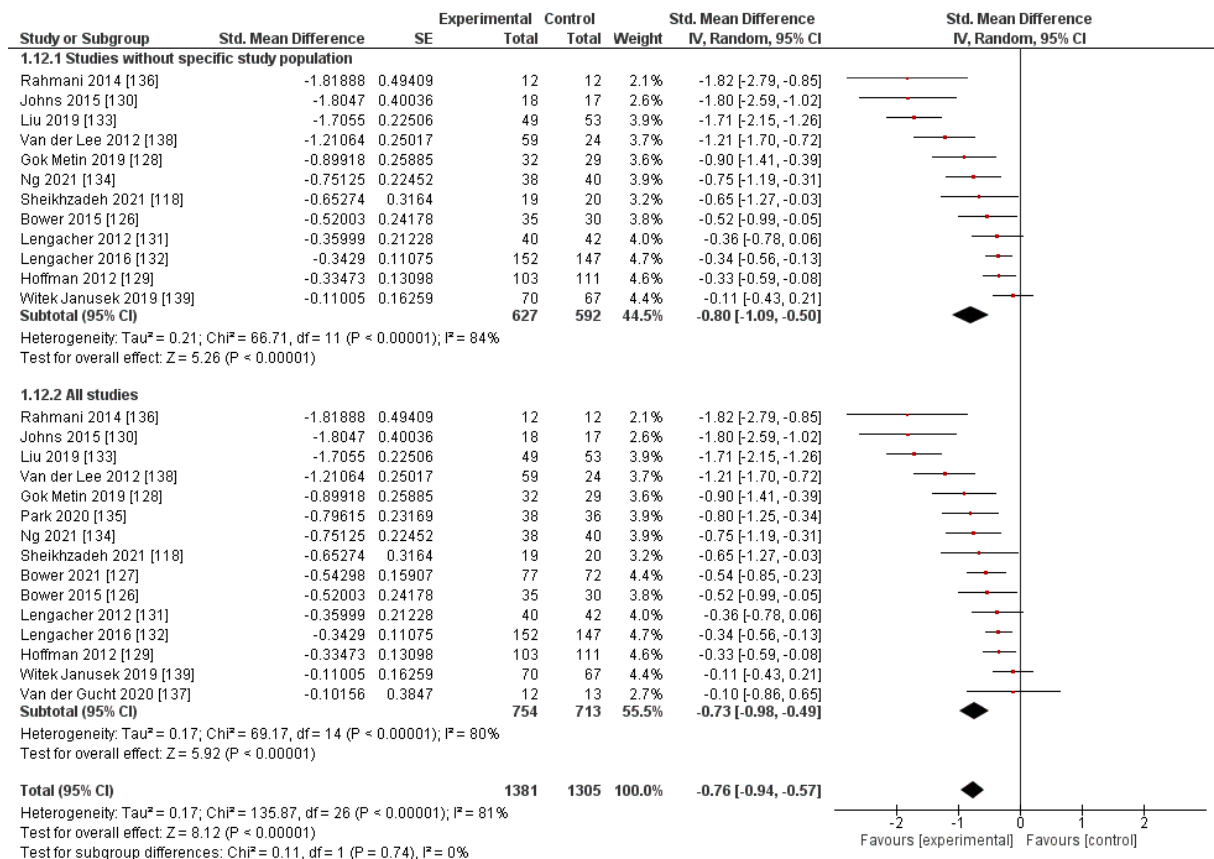

**Figure S6.3.2.** Sensitivity analysis for the comparison of mindfulness-based interventions including study populations without specific physical or mental impairment vs. all studies. *Note:* Bower (2021) [127] specifically included study participants with depression; Park (2020) [135] with depression and anxiety; Van der Gucht (2020) [137] with cognitive impairments.

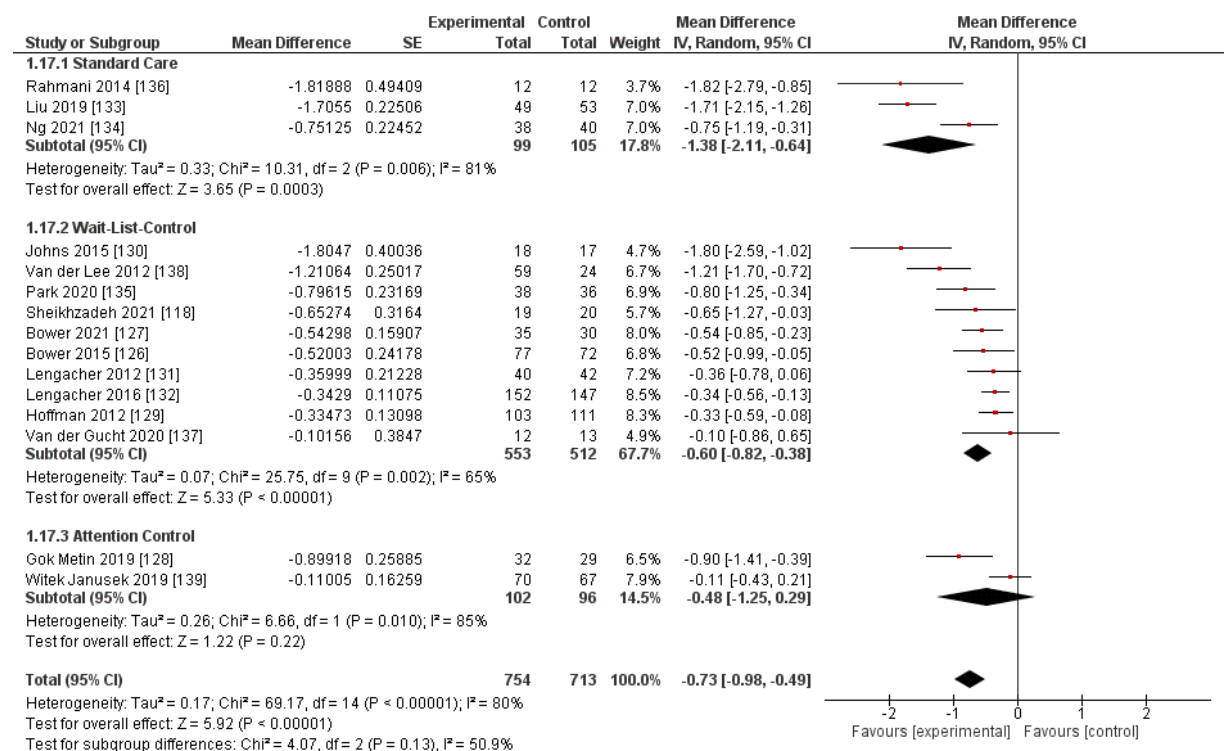

**Figure S6.3.3** Comparison of effects of mindfulness-based interventions with different control groups (standard care vs. waitlist-control vs. attention control).

*General note:* We did not calculate a sensitivity analysis with regard to risk of bias for mindfulness-based interventions, because only the study by Van der Gucht (2020) [137] had a high bias (besides blinding of participants and personnel as well as blinding of outcome assessment), which showed an effect below-average on CRF (SMD = -0.10; 95% CI -0.86, 0.65).

## References

82. Lin, P.J.; Kleckner, I.R.; Loh, K.P.; Inglis, J.E.; Peppone, L.J.; Janelins, M.C.; Kamen, C.S.; Heckler, C.E.; Culakova, E.; Pigeon, W.R.; et al. Influence of Yoga on Cancer-Related Fatigue and on Mediation Relationships Between Changes in Sleep and Cancer-Related Fatigue: A Nationwide, Multicenter Randomized Controlled Trial of Yoga in Cancer Survivors. *Integr. Cancer Ther.* **2019**, *18*, 1534735419855134. <https://doi.org/10.1177/1534735419855134>.
95. Zhi, W.I.; Baser, R.E.; Zhi, L.M.; Talukder, D.; Li, Q.S.; Paul, T.; Patterson, C.; Piulson, L.; Seluzicki, C.; Galantino, M.L.; et al. Yoga for cancer survivors with chemotherapy-induced peripheral neuropathy: Health-related quality of life outcomes. *Cancer Med.* **2021**, *10*, 5456–5465. <https://doi.org/10.1002/cam4.4098>.
108. Kim, Y.H.; Choi, K.S.; Han, K.; Kim, H.W. A psychological intervention programme for patients with breast cancer under chemotherapy and at a high risk of depression: A randomised clinical trial. *J. Clin. Nurs.* **2018**, *27*, 572–581. <https://doi.org/10.1111/jocn.13910>.
127. Bower, J.E.; Partridge, A.H.; Wolff, A.C.; Thorner, E.D.; Irwin, M.R.; Joffe, H.; Petersen, L.; Crespi, C.M.; Ganz, P.A. Targeting Depressive Symptoms in Younger Breast Cancer Survivors: The Pathways to Wellness Randomized Controlled Trial of Mindfulness Meditation and Survivorship Education. *J. Clin. Oncol.* **2021**, *39*, 3473–3484. <https://doi.org/10.1200/jco.21.00279>.
135. Park, S.; Sato, Y.; Takita, Y.; Tamura, N.; Ninomiya, A.; Kosugi, T.; Sado, M.; Nakagawa, A.; Takahashi, M.; Hayashida, T.; et al. Mindfulness-Based Cognitive Therapy for Psychological Distress, Fear of Cancer Recurrence, Fatigue, Spiritual Well-Being, and Quality of Life in Patients with Breast Cancer-A Randomized Controlled Trial. *J. Pain Symptom Manag.* **2020**, *60*, 381–389. <https://doi.org/10.1016/j.jpainsymman.2020.02.017>.
137. Van der Gucht, K.; Ahmadoun, S.; Melis, M.; de Cloe, E.; Sleurs, C.; Radwan, A.; Blommaert, J.; Takano, K.; Vandenbulcke, M.; Wildiers, H.; et al. Effects of a mindfulness-based intervention on cancer-related cognitive impairment: Results of a randomized controlled functional magnetic resonance imaging pilot study. *Cancer* **2020**, *126*, 4246–4255. <https://doi.org/10.1002/cncr.33074>.
