# Supplementary material for: Meta-Analysis of Randomized Controlled Trials on Yoga, Psychosocial, and Mindfulness-Based Interventions for Cancer-Related Fatigue: What Intervention Characteristics Are Related to Higher Efficacy?
Source: MDPI journal article supplement (doi:10.3390/cancers14082016), 2022-04-15
Supplement: s1 [file s1]

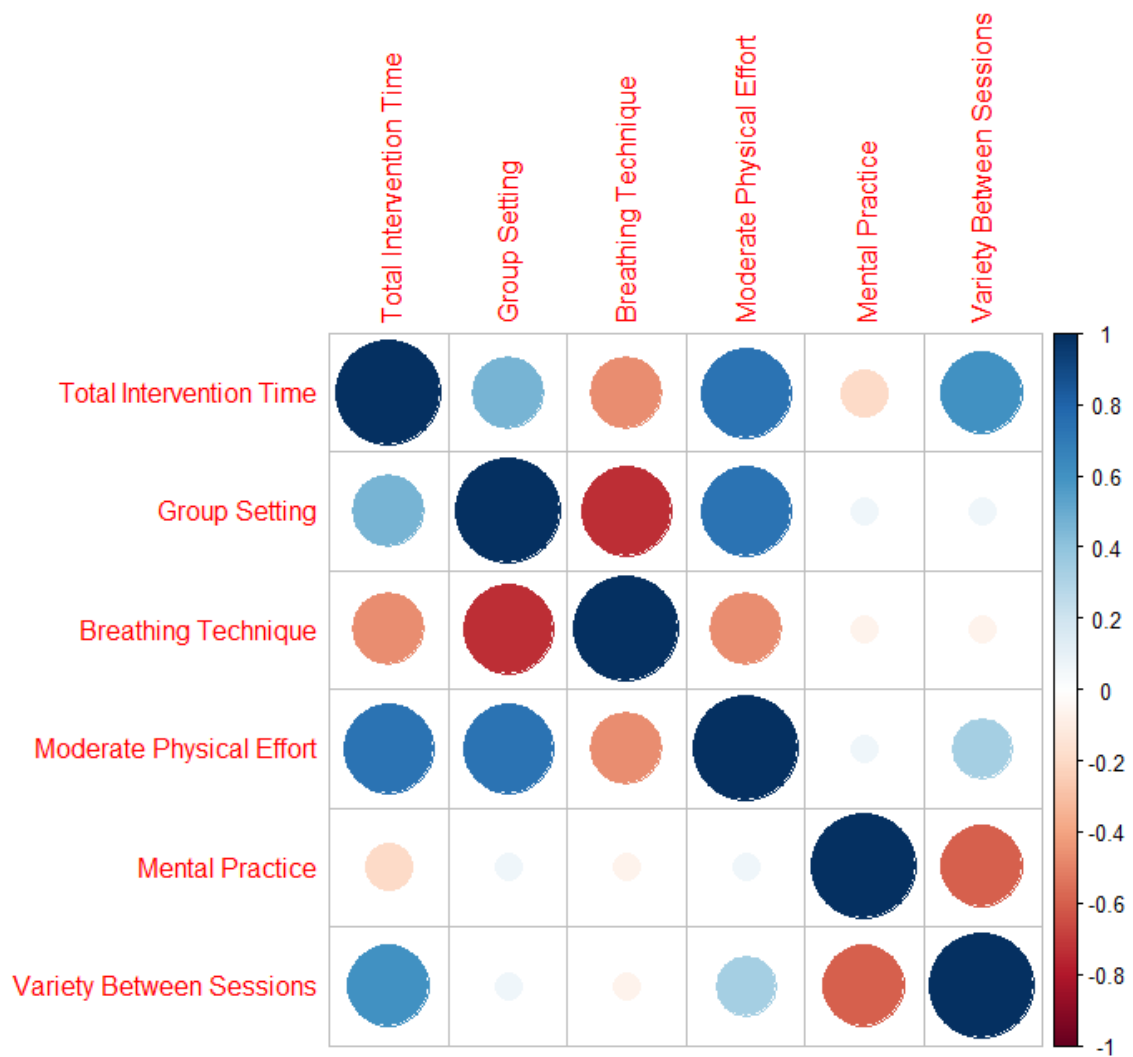

**Figure S4.1.** Correlations between characteristics of yoga interventions. *Note:* Correlations base on Phi coefficients or, when *total intervention time* included, point-biserial correlation coefficients; all variables apart from *total intervention time* were coded with 0/1.

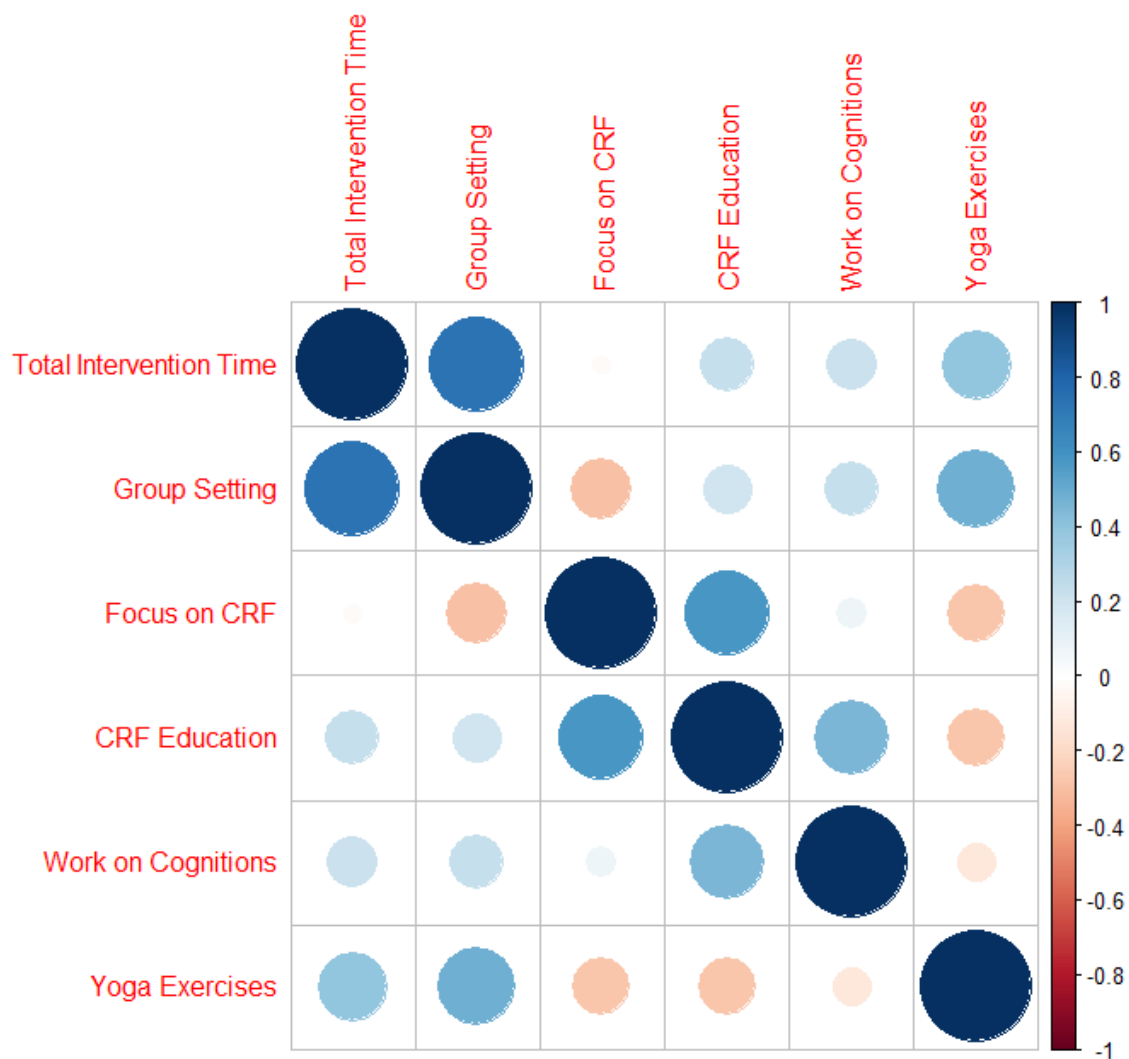

**Figure S4.2.** Correlations between characteristics of psychosocial interventions. *Note:* CRF = cancer-related fatigue; correlations base on Phi coefficients or, when *total intervention time* included, point-biserial correlation coefficients; all variables apart from *total intervention time* were coded with 0/1.

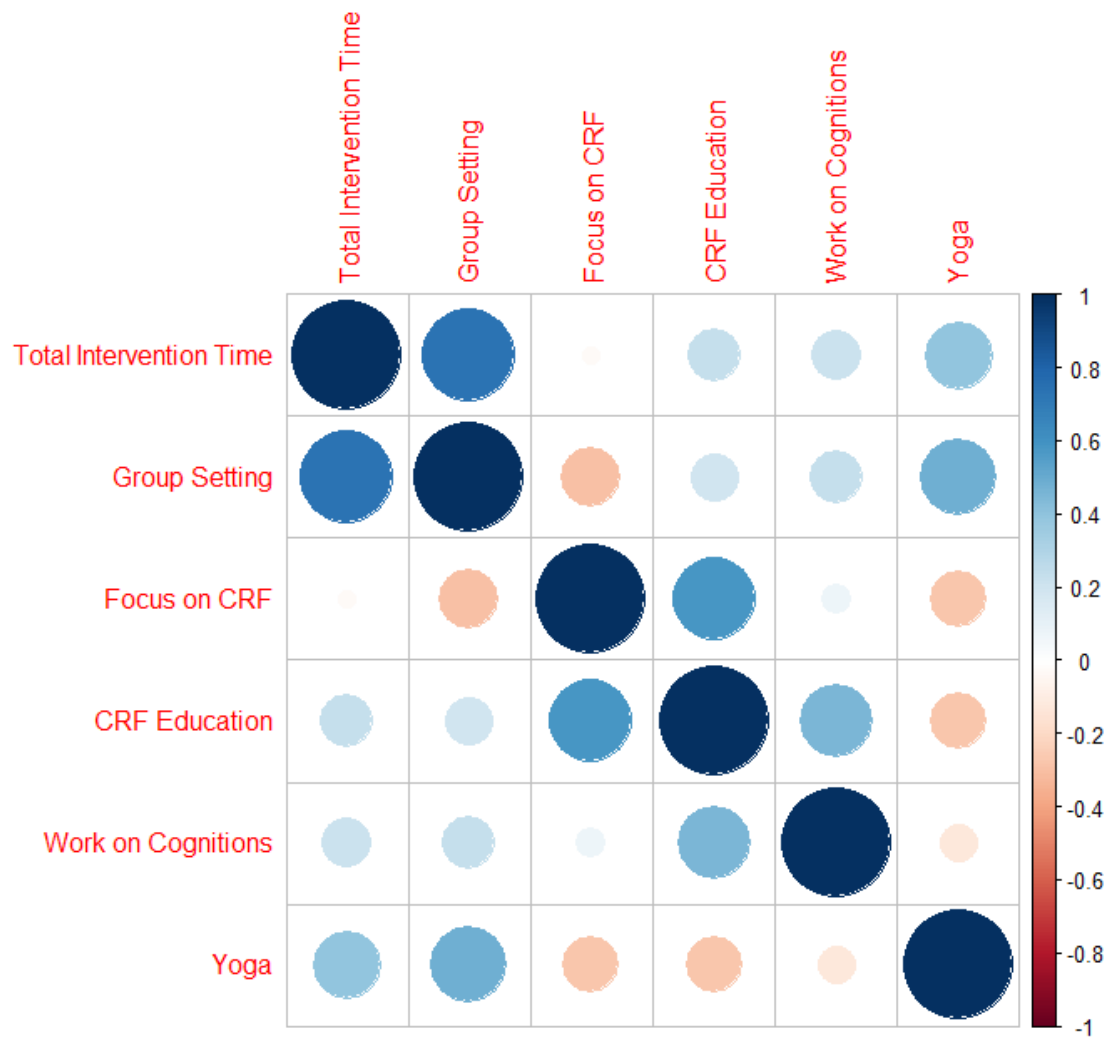

**Figure S4.3.** Correlations between characteristics of mindfulness-based interventions. *Note:* CRF = cancer-related fatigue; correlations base on Phi coefficients or, when *total intervention time* included, point-biserial correlation coefficients; all variables apart from *total intervention time* were coded with 0/1.
