# Supplementary material for: Meta-Analysis of Randomized Controlled Trials on Yoga, Psychosocial, and Mindfulness-Based Interventions for Cancer-Related Fatigue: What Intervention Characteristics Are Related to Higher Efficacy?
Source: MDPI journal article supplement (doi:10.3390/cancers14082016), 2022-04-15
Supplement: s1 [file s1]

**Table S3.1.** Meta-regression models with the best model fit for explaining standard mean differences in yoga interventions.

|                                            | <b>Model 1</b> | <b>Model 2</b> | <b>Model 3</b> | <b>Model 4</b> | <b>Model 5</b> |
|--------------------------------------------|----------------|----------------|----------------|----------------|----------------|
|                                            | <b>ß (SE)</b>  |
| <b>Intercept</b>                           | -0.62 (0.21)** | -0.99 (0.32)** | -0.21 (0.199)  | -0.42 (0.17)*  | -0.30 (0.16)   |
| <b>Breathing technique<sup>a</sup></b>     | 0.34 (0.23)    | 0.53 (0.26)    | -              | -              | -              |
| <b>Group setting<sup>a</sup></b>           | -              | 0.35 (0.24)    | -              | 0.11 (0.23)    | -              |
| <b>Mental practice<sup>a</sup></b>         | -              | -              | -0.19 (0.23)   | -              | -              |
| <b>Physical effort<sup>a</sup></b>         | -              | -              | -              | -              | -0.10 (0.22)   |
| <b>Total intervention Time<sup>b</sup></b> | -0.03 (0.09)   | -0.11 (0.11)   | -0.03 (0.10)   | -0.04 (0.11)   | 0.00 (0.11)    |
| <b>AICc</b>                                | 39.43          | 39.91          | 41.11          | 41.66          | 41.71          |
| <b>Weight</b>                              | 0.15           | 0.12           | 0.06           | 0.05           | 0.05           |

a 1=yes; 0=no.

b Variable was z-standardized and fixed in all models.

Note: ß: regression coefficient; SE: standard error; AICc: Akaike's information criterion corrected; \* $p < .05$ ; \*\* $p < .01$ .

Five best models based on their AICc are shown (apart from intercept-only model); negative regression coefficients indicate a higher intervention effect on cancer-related fatigue.

Variety between sessions was not identified as relevant variable in the top-5 models.

**Table S3.2.** Meta-regression models with the best model fit for explaining standard mean differences in psychosocial interventions.

|                                            | <b>Model 1</b>  | <b>Model 2</b>  | <b>Model 3</b>  | <b>Model 4</b>  | <b>Model 5</b>  |
|--------------------------------------------|-----------------|-----------------|-----------------|-----------------|-----------------|
|                                            | <b>ß (SE)</b>   |
| <b>Intercept</b>                           | -0.09 (0.21)    | -0.17 (0.20)    | -0.12 (0.20)    | -0.00 (0.24)    | -0.01 (0.28)    |
| <b>Group setting<sup>a</sup></b>           | -0.66 (0.20)**  | -0.59 (0.20)**  | -0.63 (0.22)**  | -0.67 (0.20)**  | -0.66 (0.20)**  |
| <b>Relaxation<sup>a</sup></b>              | 0.73 (0.16)***  | 0.79 (0.16)***  | 0.56 (0.16)**   | 0.71 (0.17)***  | 0.72 (0.16)***  |
| <b>Work on cognitions<sup>a</sup></b>      | -0.72 (0.17)*** | -0.85 (0.18)*** | -0.74 (0.19)*** | -0.78 (0.19)*** | -0.74 (0.18)*** |
| <b>CRF education<sup>a</sup></b>           | 0.37 (0.15)*    | 0.40 (0.15)*    | -               | 0.43 (0.17)*    | 0.39 (0.16)*    |
| <b>Social resources</b>                    | -               | 0.22 (0.14)     | -               | -               | -               |
| <b>Focus on fatigue<sup>a</sup></b>        | -               | -               | -               | -0.12 (0.17)    | -               |
| <b>Work on behavior<sup>a</sup></b>        | -               | -               | -               | -               | -0.10 (0.21)    |
| <b>Total Intervention Time<sup>b</sup></b> | 0.23 (0.10)*    | 0.19 (0.10)     | 0.19 (0.11)     | 0.22 (0.10)*    | 0.24 (0.10)*    |
| <b>AICc</b>                                | 33.15           | 33.98           | 35.99           | 36.25           | 36.55           |
| <b>Weight</b>                              | 0.18            | 0.13            | 0.06            | 0.05            | 0.04            |

a 1=yes; 0=no.

b Variable was z-standardized and fixed in all models.

Note: ß: regression coefficient; SE: standard error; AICc: Akaike's information criterion corrected; CRF=cancer-related fatigue;

\* $p < .05$ ; \*\* $p < .01$ ; \*\*\* $p < .001$ .

Five best models based on their AICc are shown; negative regression coefficients indicate a higher intervention effect on cancer-related fatigue. Work on emotions was not identified as relevant variable in the top-5 models.

**Table S3.3.** Meta-regression models with the best model fit for explaining standard mean differences in mindfulness-based interventions.

|                                                  | <b>Model 1</b> | <b>Model 2</b> | <b>Model 3</b> | <b>Model 4</b> |
|--------------------------------------------------|----------------|----------------|----------------|----------------|
|                                                  | <b>β (SE)</b>  | <b>β (SE)</b>  | <b>β (SE)</b>  | <b>β (SE)</b>  |
| <b>Intercept</b>                                 | -0.60 (0.16)** | -0.30 (0.63)   | -0.53 (0.27)   | -0.64 (0.17)   |
| <b>CRF education<sup>a</sup></b>                 | -0.39 (0.48)   | -              | -              | -              |
| <b>Group setting<sup>a</sup></b>                 | -              | -0.36 (0.67)   | -              | -              |
| <b>Yoga exercises<sup>a</sup></b>                | -              | -              | -0.14 (0.34)   | -              |
| <b>Work on cognitions<sup>a</sup></b>            | -              | -              | -              | 0.05 (0.35)    |
| <b>Total intervention time<sup>b, c</sup></b>    | 0.06 (0.15)    | 0.10 (0.22)    | 0.04 (0.16)    | 0.01 (0.15)    |
| <b>CRF as inclusion criterion<sup>a, c</sup></b> | -0.33 (0.45)   | -0.65 (0.41)   | -0.61 (0.39)   | -0.56 (0.38)   |
| <b>AICc</b>                                      | 36.34          | 36.91          | 37.06          | 37.30          |
| <b>Weight</b>                                    | 0.10           | 0.08           | 0.07           | 0.06           |

a 1=yes; 0=no.

b Variable was z-standardized.

c Variable was fixed in all models.

Note: β: regression coefficient; SE: standard error; AICc: Akaike's information criterion corrected;

CRF=cancer-related fatigue; \*\* $p < .01$ .

All four models within six units of the AICc of the best model are shown (apart from intercept-only model; negative regression coefficients indicate a higher intervention effect on cancer-related fatigue).

.
